# Supplementary material for: Siglec-15 recognition of sialoglycans on tumor cell lines can occur independently of sialyl Tn antigen expression
Source: Glycobiology. 2020 May 30;31(1):44–54. doi: 10.1093/glycob/cwaa048 (PMC7799145; doi:10.1093/glycob/cwaa048)
Supplement: Supplementary_data_cwaa048 [file supplementary_data_cwaa048.pdf]

Supplementary data

Figure S1

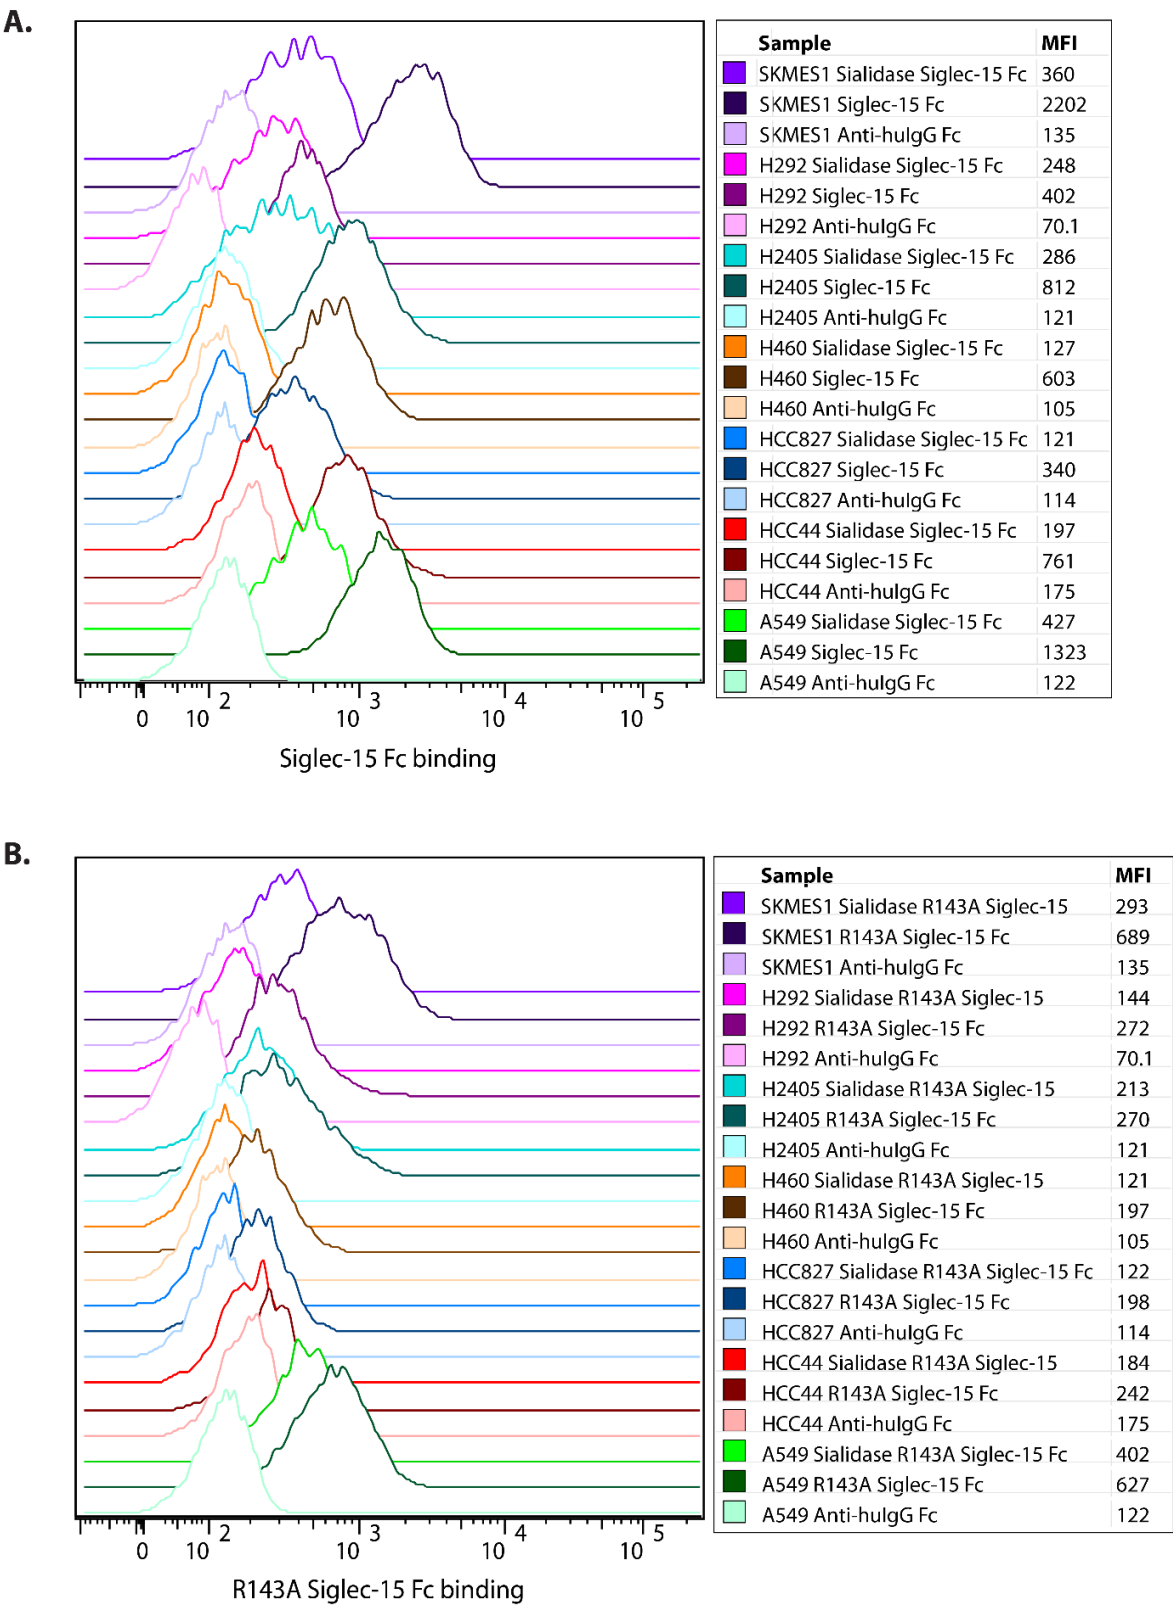

**C.**

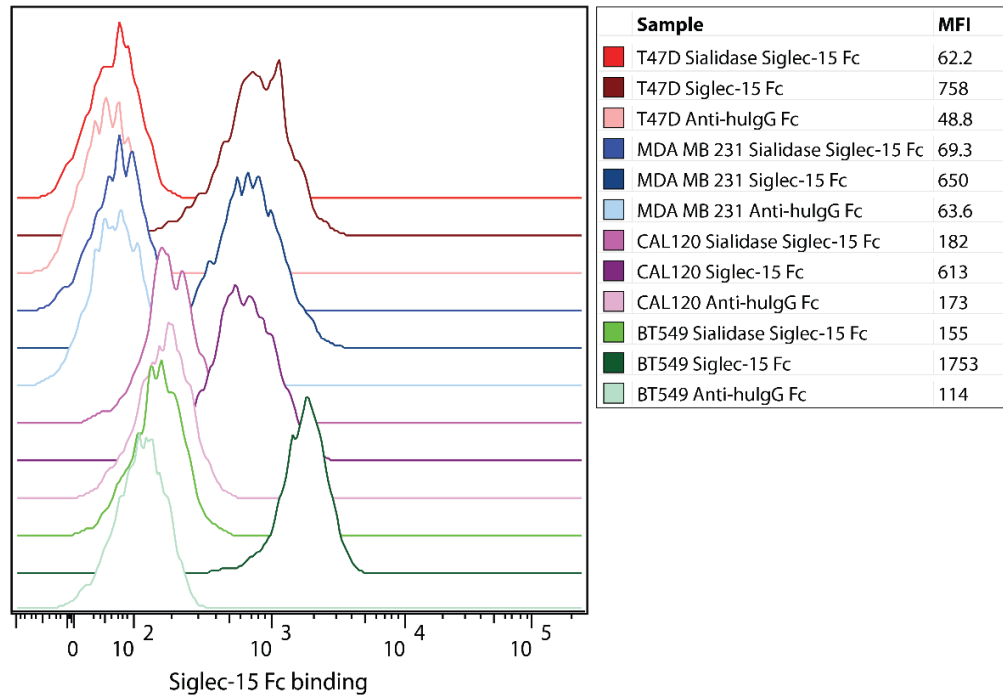

**D.**

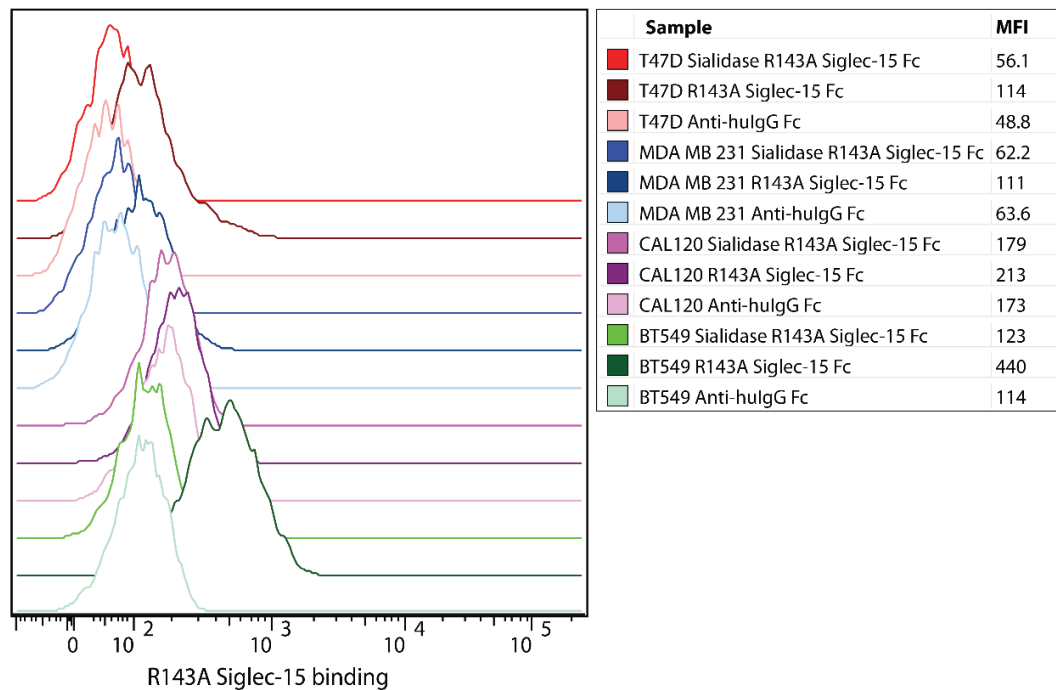

**Supplementary Figure S1. Binding of** Lung cancer cell lines were analysed for binding to recombinant Siglec-15-Fc wildtype (**A**) or R143A mutant (**B**) (each at 1  $\mu\text{g/ml}$ ) precomplexed with anti-human IgG-Fc FITC (1  $\mu\text{g/ml}$ ). Breast cancer cell lines were analysed for binding to Siglec-15-Fc wildtype (**C**) or R143A mutant (**D**) (each at 1  $\mu\text{g/ml}$ ) precomplexed with anti-human IgG Fc-FITC (1  $\mu\text{g/ml}$ ). Cells were pretreated with sialidase to determine whether Siglec-15 binding is sialic acid-dependent. Histograms are representative of three independent experiments.

**Figure S2**

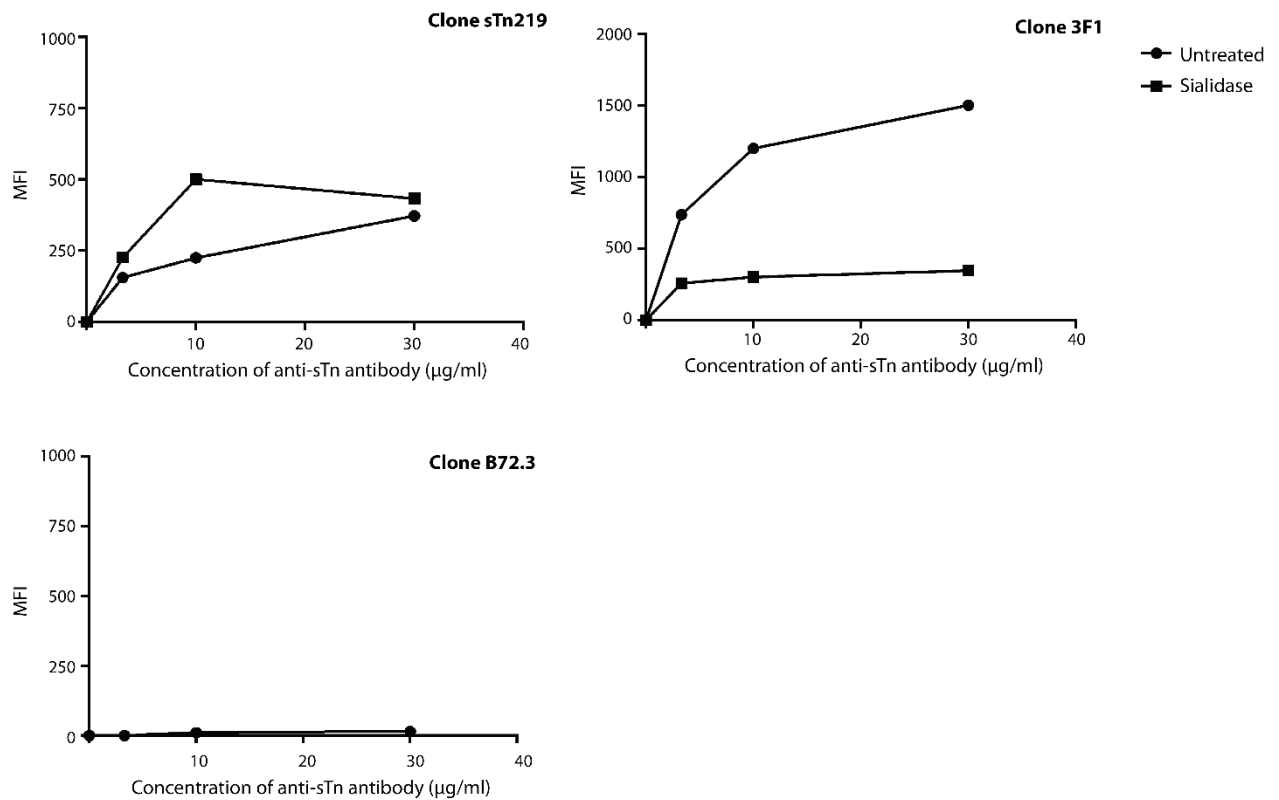

**Supplementary Figure S2.** Three different clones of anti-sTn antibodies were incubated with K562 cells at increasing concentrations (0, 3.3, 10 and 30 μg/ml) and tested for binding using PE-conjugated anti-mouse IgG secondary antibody. Sialidase-treated K562 cells were used as the negative control. MFI values were plotted against concentration of the anti-sTn antibody. Representative of two independent experiments.

**Figure S3**

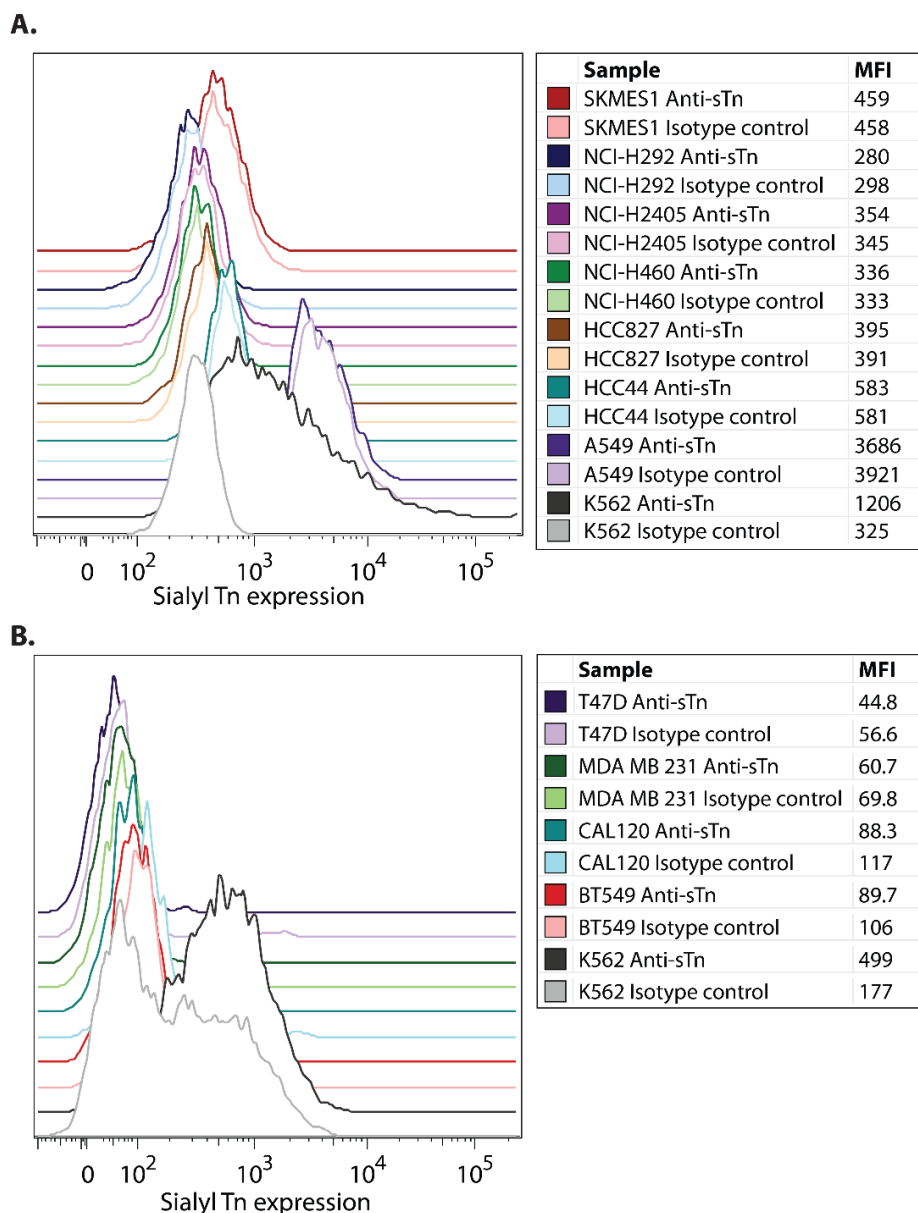

**Supplementary Figure S3.** STn expression on lung (A) and breast (B) carcinoma cell lines was analysed by incubating the cells with anti-sTn antibody clone 3F1 followed by APC-conjugated anti-mouse IgG secondary antibody. K562 cells were used as a positive control and isotype-matched mouse IgG was used as a negative control. Histograms are representative of three independent experiments.

**Figure S4**

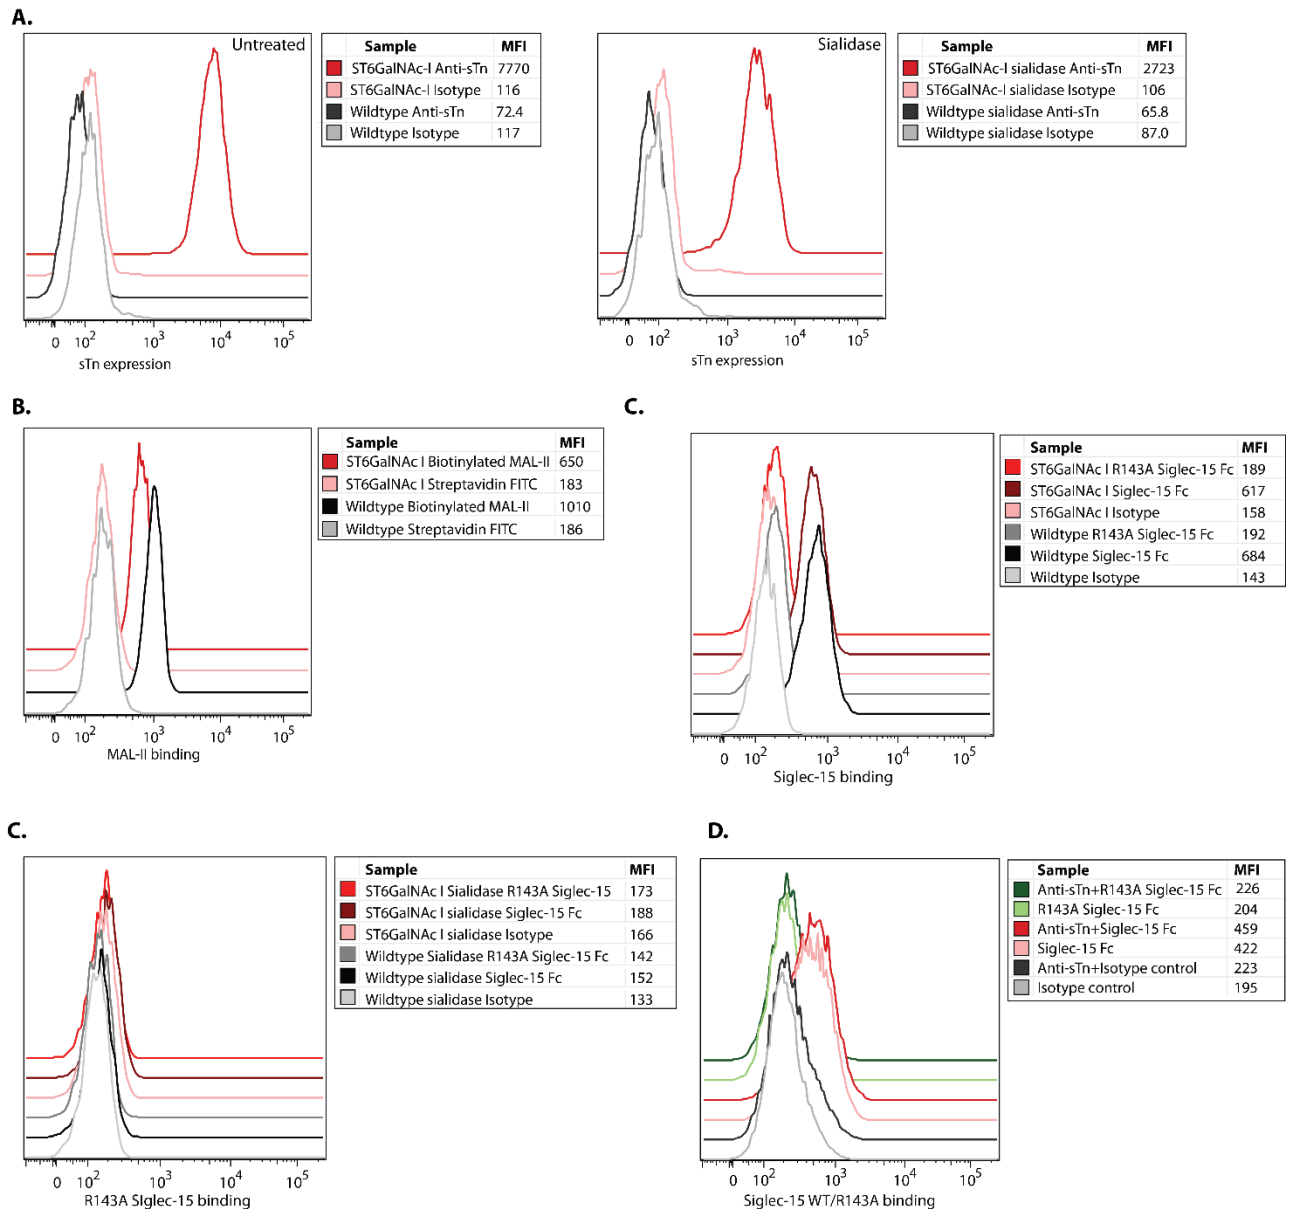

**Supplementary Figure S4.** (A) H460 wildtype and ST6GalNAc-I transferase-expressing cells, pretreated without or with sialidase, were tested for sTn expression using anti-sTn antibody (clone 3F1) followed by PE-conjugated anti-mouse IgG secondary antibody. (B) H460 cells were tested for expression of  $\alpha$ 2-3-linked sialic acids using biotinylated MAL-II (2  $\mu$ g/ml) followed by streptavidin-FITC. (C) H460 cells with or without pre-treatment with sialidase were incubated with Siglec-15-Fc wildtype or R143A mutant precomplexed with anti-human IgG Fc-FITC. (D) sTn expressed on the surface of K562 cells was blocked with anti-sTn antibody (30  $\mu$ g/ml) followed by Siglec-15-Fc wildtype or R143A mutant precomplexed with anti-human IgG Fc-FITC. Human isotype-matched IgG precomplexed with anti-IgG Fc-FITC was used as negative control. Histograms are representative of three independent experiments.

**Figure S5**

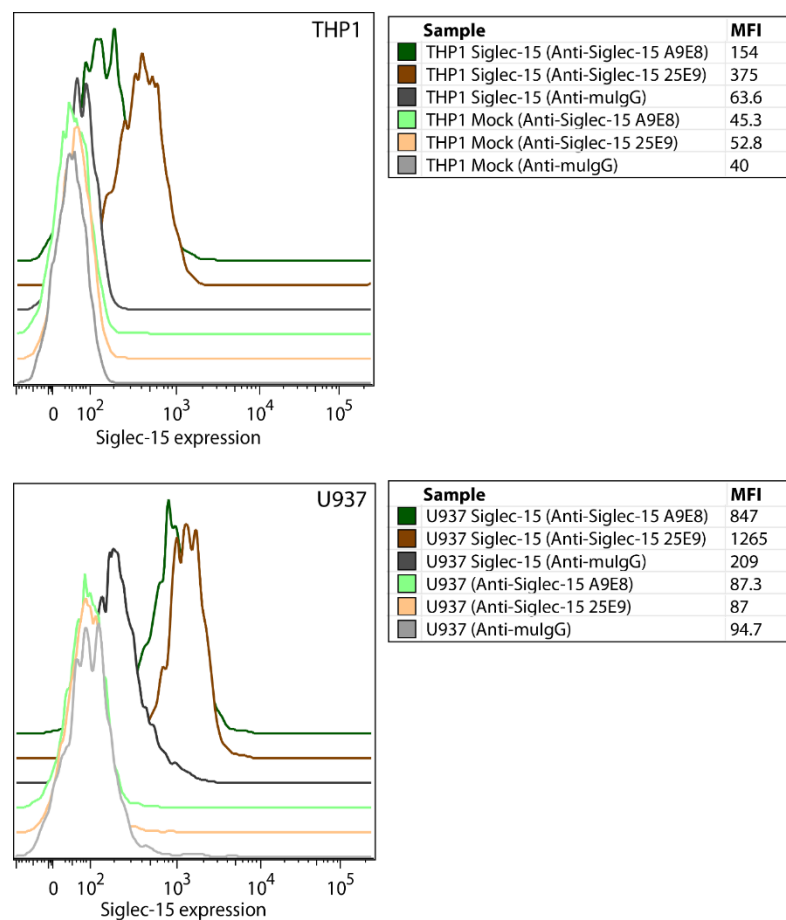

**Supplementary Figure S5.** Human monocytic cell lines THP-1 and U937 stably expressing human Siglec-15 were generated using the retroviral system. Expression of Siglec-15 on these cell lines was analysed by using two mouse monoclonal antibodies (clones 25E9 and A9E8) against Siglec-15 followed by anti-mouse IgG conjugated to PE.

**Figure S6**

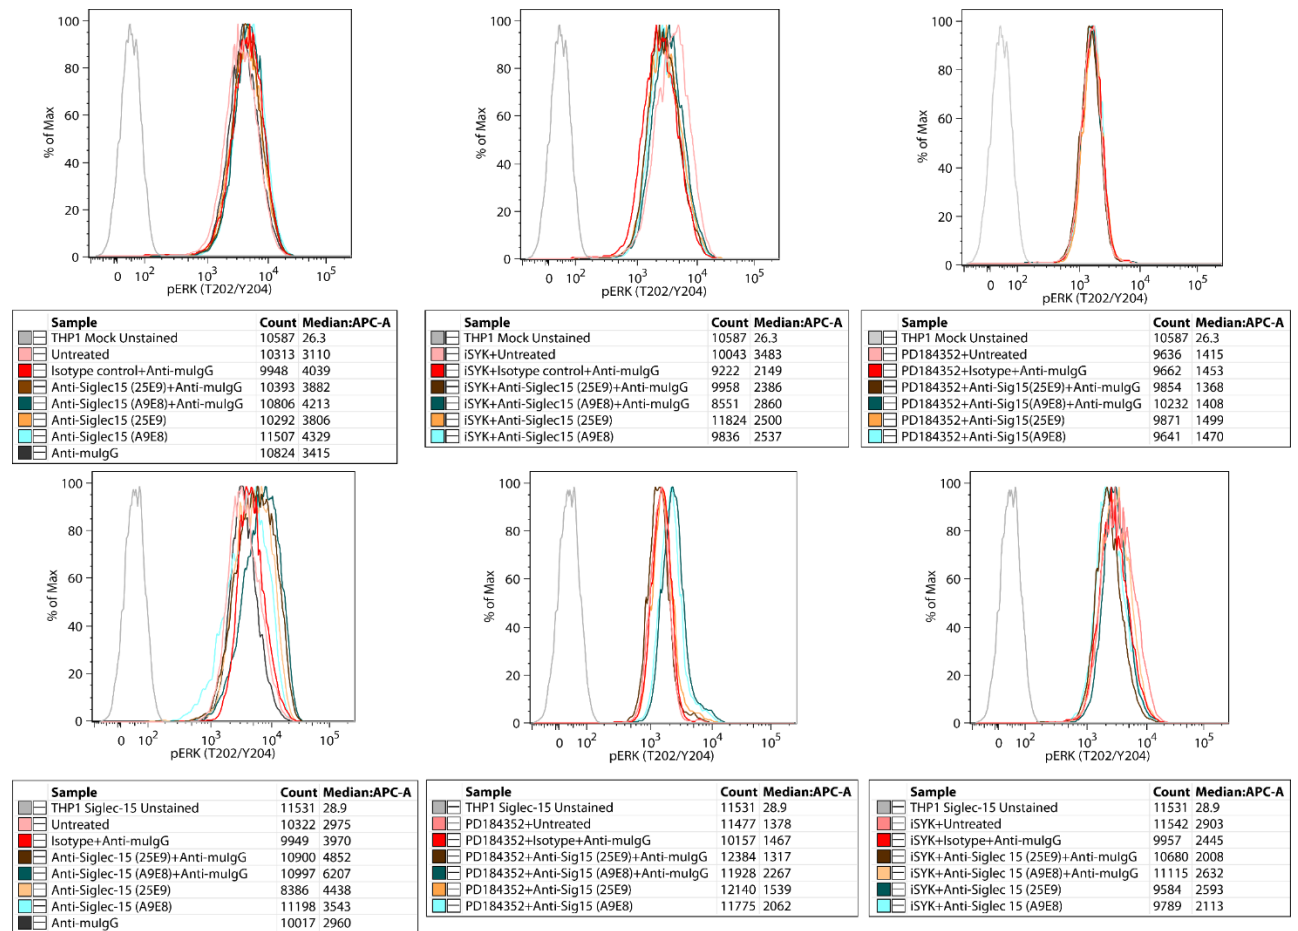

**Supplementary Figure S6.** THP-1 mock-transfected and Siglec-15-expressing cells, with or without pre-treatment with PD184352 (2  $\mu$ M) or iSYK/BI1002494 (10  $\mu$ M), were incubated with mouse anti-human Siglec-15 antibodies (6  $\mu$ g/ml) (clones 25E9 and A9E8) followed by cross-linking with anti-mouse IgG F(ab')<sub>2</sub> secondary antibody (3  $\mu$ g/ml). Cells were fixed, permeabilised and stained using rabbit anti-ERK pT202/Y204 phosphospecific antibody followed by anti-rabbit IgG F(ab')<sub>2</sub>-AF647 secondary antibody. Isotype-matched mouse antibody was used as the negative control. Histograms are representative of three independent experiments.

**Figure S7**

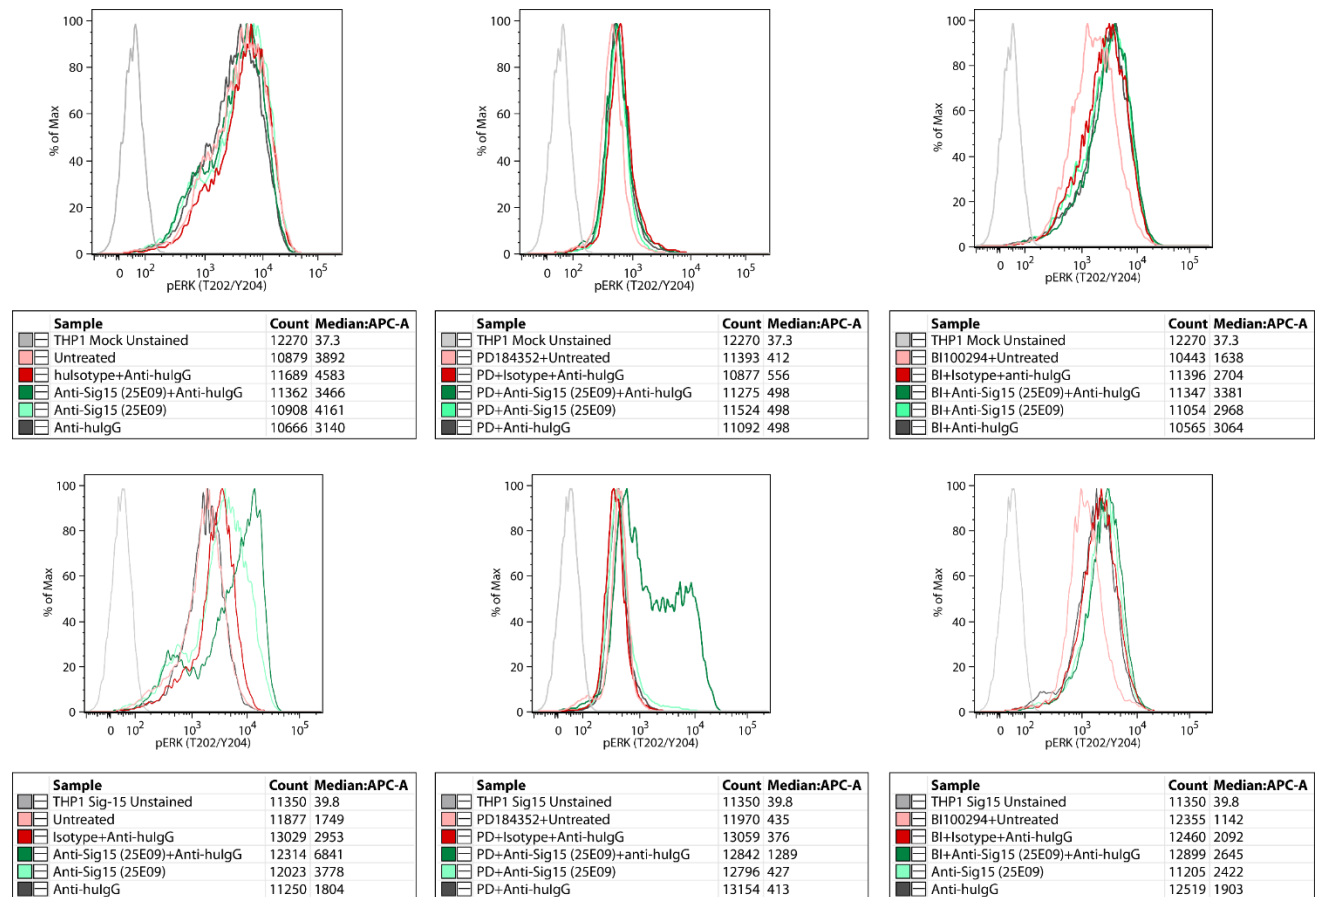

**Supplementary Figure S7.** THP-1 mock-transfected and Siglec-15-expressing cells, with or without pre-treatment with PD184352 (2  $\mu$ M) or iSYK/BI1002494 (10  $\mu$ M), were incubated with anti-Siglec-15 human IgG1 KO antibody (6  $\mu$ g/ml) (clone 25E09) followed by cross linking with anti-human IgG F(ab')<sub>2</sub> secondary antibody (3  $\mu$ g/ml). Cells were fixed, permeabilised and stained using rabbit anti-ERK pT202/Y204 phosphospecific antibody followed by anti-rabbit IgG F(ab')<sub>2</sub>-AF647 secondary antibody. Human isotype-matched antibody was used as the negative control. Histograms are representative of three independent experiments.

**Figure S8**

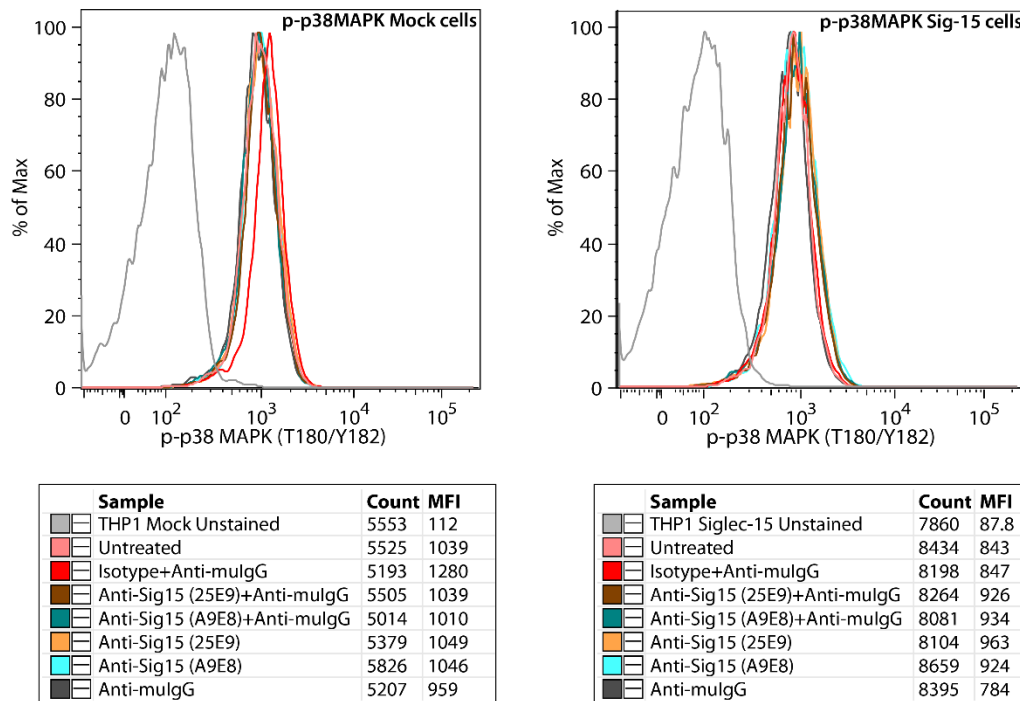

**Supplementary Figure S8.** THP1 mock-transfected and Siglec-15-expressing cells were incubated with mouse anti-human Siglec-15 antibodies (6  $\mu\text{g/ml}$ ) (clones 25E9 and A9E8) followed by cross linking with anti-mouse IgG F(ab')<sub>2</sub> secondary antibody (3  $\mu\text{g/ml}$ ). Cells were fixed, permeabilised and stained using rabbit anti-p38 MAPK pT180/Y182 phosphospecific antibody followed by anti-rabbit IgG F(ab')<sub>2</sub>-AF647 secondary antibody. Isotype-matched mouse IgG was used as the negative control. Histograms are representative of two independent experiments.

**Supplementary Table SI.** Glycan microarray document based on MIRAGE Glycan Microarray Guidelines (doi:10.3762/mirage.3)

| Classification                         |                                                                                                                                                                                                                                                                                                                                                                                                                                                                                                                                                                                                                                                                                                                                                                                                                                                                                                                                                                                                                                                                                                                                                                                                                                                                                                                                                                                                                                                                                                                                                                                                                                                                                                                                                                                                   | Guidelines        |                                                                                                           |                                                |                   |                       |                |                           |  |  |  |          |   |                     |                                   |          |   |                         |                                        |            |   |                                    |          |               |   |                             |          |              |   |                           |                                        |              |   |                           |                                        |            |   |                                        |                                        |          |   |                                                   |                                        |           |   |                                                           |                                        |             |    |                                                                                                           |                                        |                |    |                         |                                |                  |    |                               |                                                |
|----------------------------------------|---------------------------------------------------------------------------------------------------------------------------------------------------------------------------------------------------------------------------------------------------------------------------------------------------------------------------------------------------------------------------------------------------------------------------------------------------------------------------------------------------------------------------------------------------------------------------------------------------------------------------------------------------------------------------------------------------------------------------------------------------------------------------------------------------------------------------------------------------------------------------------------------------------------------------------------------------------------------------------------------------------------------------------------------------------------------------------------------------------------------------------------------------------------------------------------------------------------------------------------------------------------------------------------------------------------------------------------------------------------------------------------------------------------------------------------------------------------------------------------------------------------------------------------------------------------------------------------------------------------------------------------------------------------------------------------------------------------------------------------------------------------------------------------------------|-------------------|-----------------------------------------------------------------------------------------------------------|------------------------------------------------|-------------------|-----------------------|----------------|---------------------------|--|--|--|----------|---|---------------------|-----------------------------------|----------|---|-------------------------|----------------------------------------|------------|---|------------------------------------|----------|---------------|---|-----------------------------|----------|--------------|---|---------------------------|----------------------------------------|--------------|---|---------------------------|----------------------------------------|------------|---|----------------------------------------|----------------------------------------|----------|---|---------------------------------------------------|----------------------------------------|-----------|---|-----------------------------------------------------------|----------------------------------------|-------------|----|-----------------------------------------------------------------------------------------------------------|----------------------------------------|----------------|----|-------------------------|--------------------------------|------------------|----|-------------------------------|------------------------------------------------|
| 1. Sample: Glycan Binding Sample       |                                                                                                                                                                                                                                                                                                                                                                                                                                                                                                                                                                                                                                                                                                                                                                                                                                                                                                                                                                                                                                                                                                                                                                                                                                                                                                                                                                                                                                                                                                                                                                                                                                                                                                                                                                                                   |                   |                                                                                                           |                                                |                   |                       |                |                           |  |  |  |          |   |                     |                                   |          |   |                         |                                        |            |   |                                    |          |               |   |                             |          |              |   |                           |                                        |              |   |                           |                                        |            |   |                                        |                                        |          |   |                                                   |                                        |           |   |                                                           |                                        |             |    |                                                                                                           |                                        |                |    |                         |                                |                  |    |                               |                                                |
| Description of Sample                  | <p><u>Sample names:</u></p> <p>Human Siglec-15 wildtype (hSiglec-15 WT) and Arg134Ala mutant (hSiglec-15 ArgR143Ala) are recombinant and were expressed as Fc-fusion proteins as described in materials methods section in the main text.</p> <p>Anti-sialyl Tn monoclonal antibody (anti-STn 3F1-IgG) was from SBH Sciences (USA).</p>                                                                                                                                                                                                                                                                                                                                                                                                                                                                                                                                                                                                                                                                                                                                                                                                                                                                                                                                                                                                                                                                                                                                                                                                                                                                                                                                                                                                                                                           |                   |                                                                                                           |                                                |                   |                       |                |                           |  |  |  |          |   |                     |                                   |          |   |                         |                                        |            |   |                                    |          |               |   |                             |          |              |   |                           |                                        |              |   |                           |                                        |            |   |                                        |                                        |          |   |                                                   |                                        |           |   |                                                           |                                        |             |    |                                                                                                           |                                        |                |    |                         |                                |                  |    |                               |                                                |
| Sample modifications                   | Not relevant.                                                                                                                                                                                                                                                                                                                                                                                                                                                                                                                                                                                                                                                                                                                                                                                                                                                                                                                                                                                                                                                                                                                                                                                                                                                                                                                                                                                                                                                                                                                                                                                                                                                                                                                                                                                     |                   |                                                                                                           |                                                |                   |                       |                |                           |  |  |  |          |   |                     |                                   |          |   |                         |                                        |            |   |                                    |          |               |   |                             |          |              |   |                           |                                        |              |   |                           |                                        |            |   |                                        |                                        |          |   |                                                   |                                        |           |   |                                                           |                                        |             |    |                                                                                                           |                                        |                |    |                         |                                |                  |    |                               |                                                |
| Assay protocol                         | <p>Assay procedures were according established protocols (<a href="#">Liu et al., Methods Mol Biol. 2012</a>)(<a href="#">Liu et al. 2012</a>). In brief, the arrayed slides were blocked with 2% w/v BSA in 100 mM Phosphate Buffer Saline pH 7.4 (2%BSA/PBS). The Siglec-15 chimeras were analysed as multimers at 2 µg/ml, prepared by pre-complexing with the biotinylated goat anti-human IgG (VECTOR, BA300) at 1:1 ratio (by weight). The Siglec-15-antibody complex was prepared by pre-incubating the protein and antibody, diluted in the final required volume of blocking buffer, for 1h at 4°C. The anti-sialyl Tn antibody 3F1 was analysed at 50µg/ml prepared in binding buffer (1% BSA/PBS), followed by incubation (1h) with 10 µg/ml biotinylated anti-mouse IgG (SIGMA, B-7264) .</p>                                                                                                                                                                                                                                                                                                                                                                                                                                                                                                                                                                                                                                                                                                                                                                                                                                                                                                                                                                                         |                   |                                                                                                           |                                                |                   |                       |                |                           |  |  |  |          |   |                     |                                   |          |   |                         |                                        |            |   |                                    |          |               |   |                             |          |              |   |                           |                                        |              |   |                           |                                        |            |   |                                        |                                        |          |   |                                                   |                                        |           |   |                                                           |                                        |             |    |                                                                                                           |                                        |                |    |                         |                                |                  |    |                               |                                                |
| 2. Glycan Library                      |                                                                                                                                                                                                                                                                                                                                                                                                                                                                                                                                                                                                                                                                                                                                                                                                                                                                                                                                                                                                                                                                                                                                                                                                                                                                                                                                                                                                                                                                                                                                                                                                                                                                                                                                                                                                   |                   |                                                                                                           |                                                |                   |                       |                |                           |  |  |  |          |   |                     |                                   |          |   |                         |                                        |            |   |                                    |          |               |   |                             |          |              |   |                           |                                        |              |   |                           |                                        |            |   |                                        |                                        |          |   |                                                   |                                        |           |   |                                                           |                                        |             |    |                                                                                                           |                                        |                |    |                         |                                |                  |    |                               |                                                |
| Glycan description for defined glycans | <p>Sixty amino-terminating glycans (aminoalkyl-, phenyl- or glycine-terminating, or natural serine or threonine terminating amino acids) were used to prepare neoglycolipids (NGLs). These are listed and referenced below, together with 22 reducing oligosaccharides or glycosylceramides used as reference glycans.</p>                                                                                                                                                                                                                                                                                                                                                                                                                                                                                                                                                                                                                                                                                                                                                                                                                                                                                                                                                                                                                                                                                                                                                                                                                                                                                                                                                                                                                                                                        |                   |                                                                                                           |                                                |                   |                       |                |                           |  |  |  |          |   |                     |                                   |          |   |                         |                                        |            |   |                                    |          |               |   |                             |          |              |   |                           |                                        |              |   |                           |                                        |            |   |                                        |                                        |          |   |                                                   |                                        |           |   |                                                           |                                        |             |    |                                                                                                           |                                        |                |    |                         |                                |                  |    |                               |                                                |
|                                        | <table><tr><th>Probe Designation</th><th>Pos.<sup>a</sup></th><th>Sequence<sup>b</sup></th><th>Glycan sources</th></tr><tr><td colspan="4">Amino-terminating glycans</td></tr><tr><td>Lac-C2-N</td><td>1</td><td>Galβ-4Glcβ-O-C2-NH2</td><td>W Chai and colleagues (submitted)</td></tr><tr><td>2'FL-Gly</td><td>2</td><td>Fucα-2Galβ-4Glcβ-NH-Gly</td><td>Human milk (Likhosherstov et al. 2012)</td></tr><tr><td>B-tri-C3-N</td><td>3</td><td>Galα-3Galβ-O-C3-NH2<br/> <br/>Fucα-2</td><td>Elicityl</td></tr><tr><td>3'SA-Lac-C2-N</td><td>4</td><td>NeuAcα-3Galβ-4Glcβ-O-C2-NH2</td><td>Elicityl</td></tr><tr><td>3'SA-Lac-Gly</td><td>5</td><td>NeuAcα-3Galβ-4Glcβ-NH-Gly</td><td>Human milk (Likhosherstov et al. 2016)</td></tr><tr><td>6'SA-Lac-Gly</td><td>6</td><td>NeuAcα-6Galβ-4Glcβ-NH-Gly</td><td>Human milk (Likhosherstov et al. 2016)</td></tr><tr><td>LNFP I-Gly</td><td>7</td><td>Fucα-2Galβ-3GlcNAcβ-3Galβ-4Glcβ-NH-Gly</td><td>Human milk (Likhosherstov et al. 2012)</td></tr><tr><td>LSTb-Gly</td><td>8</td><td>Galβ-3GlcNAcβ-3Galβ-4Glcβ-NH-Gly<br/> <br/>NeuAcα-6</td><td>Human milk (Likhosherstov et al. 2016)</td></tr><tr><td>DSLNT-Gly</td><td>9</td><td>NeuAcα-3Galβ-3GlcNAcβ-3Galβ-4Glcβ-NH-Gly<br/> <br/>NeuAcα-6</td><td>Human milk (Likhosherstov et al. 2016)</td></tr><tr><td>DSMFLNH-Gly</td><td>10</td><td>Galβ-4GlcNAcβ-6<br/> <br/>Fucα-3<br/> <br/>Galβ-4Glcβ-NH-Gly<br/> <br/>NeuAcα-3Galβ-3GlcNAcβ-3<br/> <br/>NeuAcα-6</td><td>Human milk (Likhosherstov et al. 2016)</td></tr><tr><td>ChitoBiase-Gly</td><td>11</td><td>GlcNAcβ-4GlcNAcβ-NH-Gly</td><td>Chitin (Nishimura et al. 1989)</td></tr><tr><td>Fuc(3)GlcNAc-Gly</td><td>12</td><td>GlcNAcβ-NH-Gly<br/> <br/>Fucα-3</td><td>Chemical synthesis (Likhosherstov et al. 2015)</td></tr></table> |                   |                                                                                                           | Probe Designation                              | Pos. <sup>a</sup> | Sequence <sup>b</sup> | Glycan sources | Amino-terminating glycans |  |  |  | Lac-C2-N | 1 | Galβ-4Glcβ-O-C2-NH2 | W Chai and colleagues (submitted) | 2'FL-Gly | 2 | Fucα-2Galβ-4Glcβ-NH-Gly | Human milk (Likhosherstov et al. 2012) | B-tri-C3-N | 3 | Galα-3Galβ-O-C3-NH2<br> <br>Fucα-2 | Elicityl | 3'SA-Lac-C2-N | 4 | NeuAcα-3Galβ-4Glcβ-O-C2-NH2 | Elicityl | 3'SA-Lac-Gly | 5 | NeuAcα-3Galβ-4Glcβ-NH-Gly | Human milk (Likhosherstov et al. 2016) | 6'SA-Lac-Gly | 6 | NeuAcα-6Galβ-4Glcβ-NH-Gly | Human milk (Likhosherstov et al. 2016) | LNFP I-Gly | 7 | Fucα-2Galβ-3GlcNAcβ-3Galβ-4Glcβ-NH-Gly | Human milk (Likhosherstov et al. 2012) | LSTb-Gly | 8 | Galβ-3GlcNAcβ-3Galβ-4Glcβ-NH-Gly<br> <br>NeuAcα-6 | Human milk (Likhosherstov et al. 2016) | DSLNT-Gly | 9 | NeuAcα-3Galβ-3GlcNAcβ-3Galβ-4Glcβ-NH-Gly<br> <br>NeuAcα-6 | Human milk (Likhosherstov et al. 2016) | DSMFLNH-Gly | 10 | Galβ-4GlcNAcβ-6<br> <br>Fucα-3<br> <br>Galβ-4Glcβ-NH-Gly<br> <br>NeuAcα-3Galβ-3GlcNAcβ-3<br> <br>NeuAcα-6 | Human milk (Likhosherstov et al. 2016) | ChitoBiase-Gly | 11 | GlcNAcβ-4GlcNAcβ-NH-Gly | Chitin (Nishimura et al. 1989) | Fuc(3)GlcNAc-Gly | 12 | GlcNAcβ-NH-Gly<br> <br>Fucα-3 | Chemical synthesis (Likhosherstov et al. 2015) |
|                                        | Probe Designation                                                                                                                                                                                                                                                                                                                                                                                                                                                                                                                                                                                                                                                                                                                                                                                                                                                                                                                                                                                                                                                                                                                                                                                                                                                                                                                                                                                                                                                                                                                                                                                                                                                                                                                                                                                 | Pos. <sup>a</sup> | Sequence <sup>b</sup>                                                                                     | Glycan sources                                 |                   |                       |                |                           |  |  |  |          |   |                     |                                   |          |   |                         |                                        |            |   |                                    |          |               |   |                             |          |              |   |                           |                                        |              |   |                           |                                        |            |   |                                        |                                        |          |   |                                                   |                                        |           |   |                                                           |                                        |             |    |                                                                                                           |                                        |                |    |                         |                                |                  |    |                               |                                                |
|                                        | Amino-terminating glycans                                                                                                                                                                                                                                                                                                                                                                                                                                                                                                                                                                                                                                                                                                                                                                                                                                                                                                                                                                                                                                                                                                                                                                                                                                                                                                                                                                                                                                                                                                                                                                                                                                                                                                                                                                         |                   |                                                                                                           |                                                |                   |                       |                |                           |  |  |  |          |   |                     |                                   |          |   |                         |                                        |            |   |                                    |          |               |   |                             |          |              |   |                           |                                        |              |   |                           |                                        |            |   |                                        |                                        |          |   |                                                   |                                        |           |   |                                                           |                                        |             |    |                                                                                                           |                                        |                |    |                         |                                |                  |    |                               |                                                |
|                                        | Lac-C2-N                                                                                                                                                                                                                                                                                                                                                                                                                                                                                                                                                                                                                                                                                                                                                                                                                                                                                                                                                                                                                                                                                                                                                                                                                                                                                                                                                                                                                                                                                                                                                                                                                                                                                                                                                                                          | 1                 | Galβ-4Glcβ-O-C2-NH2                                                                                       | W Chai and colleagues (submitted)              |                   |                       |                |                           |  |  |  |          |   |                     |                                   |          |   |                         |                                        |            |   |                                    |          |               |   |                             |          |              |   |                           |                                        |              |   |                           |                                        |            |   |                                        |                                        |          |   |                                                   |                                        |           |   |                                                           |                                        |             |    |                                                                                                           |                                        |                |    |                         |                                |                  |    |                               |                                                |
|                                        | 2'FL-Gly                                                                                                                                                                                                                                                                                                                                                                                                                                                                                                                                                                                                                                                                                                                                                                                                                                                                                                                                                                                                                                                                                                                                                                                                                                                                                                                                                                                                                                                                                                                                                                                                                                                                                                                                                                                          | 2                 | Fucα-2Galβ-4Glcβ-NH-Gly                                                                                   | Human milk (Likhosherstov et al. 2012)         |                   |                       |                |                           |  |  |  |          |   |                     |                                   |          |   |                         |                                        |            |   |                                    |          |               |   |                             |          |              |   |                           |                                        |              |   |                           |                                        |            |   |                                        |                                        |          |   |                                                   |                                        |           |   |                                                           |                                        |             |    |                                                                                                           |                                        |                |    |                         |                                |                  |    |                               |                                                |
|                                        | B-tri-C3-N                                                                                                                                                                                                                                                                                                                                                                                                                                                                                                                                                                                                                                                                                                                                                                                                                                                                                                                                                                                                                                                                                                                                                                                                                                                                                                                                                                                                                                                                                                                                                                                                                                                                                                                                                                                        | 3                 | Galα-3Galβ-O-C3-NH2<br> <br>Fucα-2                                                                        | Elicityl                                       |                   |                       |                |                           |  |  |  |          |   |                     |                                   |          |   |                         |                                        |            |   |                                    |          |               |   |                             |          |              |   |                           |                                        |              |   |                           |                                        |            |   |                                        |                                        |          |   |                                                   |                                        |           |   |                                                           |                                        |             |    |                                                                                                           |                                        |                |    |                         |                                |                  |    |                               |                                                |
|                                        | 3'SA-Lac-C2-N                                                                                                                                                                                                                                                                                                                                                                                                                                                                                                                                                                                                                                                                                                                                                                                                                                                                                                                                                                                                                                                                                                                                                                                                                                                                                                                                                                                                                                                                                                                                                                                                                                                                                                                                                                                     | 4                 | NeuAcα-3Galβ-4Glcβ-O-C2-NH2                                                                               | Elicityl                                       |                   |                       |                |                           |  |  |  |          |   |                     |                                   |          |   |                         |                                        |            |   |                                    |          |               |   |                             |          |              |   |                           |                                        |              |   |                           |                                        |            |   |                                        |                                        |          |   |                                                   |                                        |           |   |                                                           |                                        |             |    |                                                                                                           |                                        |                |    |                         |                                |                  |    |                               |                                                |
|                                        | 3'SA-Lac-Gly                                                                                                                                                                                                                                                                                                                                                                                                                                                                                                                                                                                                                                                                                                                                                                                                                                                                                                                                                                                                                                                                                                                                                                                                                                                                                                                                                                                                                                                                                                                                                                                                                                                                                                                                                                                      | 5                 | NeuAcα-3Galβ-4Glcβ-NH-Gly                                                                                 | Human milk (Likhosherstov et al. 2016)         |                   |                       |                |                           |  |  |  |          |   |                     |                                   |          |   |                         |                                        |            |   |                                    |          |               |   |                             |          |              |   |                           |                                        |              |   |                           |                                        |            |   |                                        |                                        |          |   |                                                   |                                        |           |   |                                                           |                                        |             |    |                                                                                                           |                                        |                |    |                         |                                |                  |    |                               |                                                |
|                                        | 6'SA-Lac-Gly                                                                                                                                                                                                                                                                                                                                                                                                                                                                                                                                                                                                                                                                                                                                                                                                                                                                                                                                                                                                                                                                                                                                                                                                                                                                                                                                                                                                                                                                                                                                                                                                                                                                                                                                                                                      | 6                 | NeuAcα-6Galβ-4Glcβ-NH-Gly                                                                                 | Human milk (Likhosherstov et al. 2016)         |                   |                       |                |                           |  |  |  |          |   |                     |                                   |          |   |                         |                                        |            |   |                                    |          |               |   |                             |          |              |   |                           |                                        |              |   |                           |                                        |            |   |                                        |                                        |          |   |                                                   |                                        |           |   |                                                           |                                        |             |    |                                                                                                           |                                        |                |    |                         |                                |                  |    |                               |                                                |
|                                        | LNFP I-Gly                                                                                                                                                                                                                                                                                                                                                                                                                                                                                                                                                                                                                                                                                                                                                                                                                                                                                                                                                                                                                                                                                                                                                                                                                                                                                                                                                                                                                                                                                                                                                                                                                                                                                                                                                                                        | 7                 | Fucα-2Galβ-3GlcNAcβ-3Galβ-4Glcβ-NH-Gly                                                                    | Human milk (Likhosherstov et al. 2012)         |                   |                       |                |                           |  |  |  |          |   |                     |                                   |          |   |                         |                                        |            |   |                                    |          |               |   |                             |          |              |   |                           |                                        |              |   |                           |                                        |            |   |                                        |                                        |          |   |                                                   |                                        |           |   |                                                           |                                        |             |    |                                                                                                           |                                        |                |    |                         |                                |                  |    |                               |                                                |
|                                        | LSTb-Gly                                                                                                                                                                                                                                                                                                                                                                                                                                                                                                                                                                                                                                                                                                                                                                                                                                                                                                                                                                                                                                                                                                                                                                                                                                                                                                                                                                                                                                                                                                                                                                                                                                                                                                                                                                                          | 8                 | Galβ-3GlcNAcβ-3Galβ-4Glcβ-NH-Gly<br> <br>NeuAcα-6                                                         | Human milk (Likhosherstov et al. 2016)         |                   |                       |                |                           |  |  |  |          |   |                     |                                   |          |   |                         |                                        |            |   |                                    |          |               |   |                             |          |              |   |                           |                                        |              |   |                           |                                        |            |   |                                        |                                        |          |   |                                                   |                                        |           |   |                                                           |                                        |             |    |                                                                                                           |                                        |                |    |                         |                                |                  |    |                               |                                                |
|                                        | DSLNT-Gly                                                                                                                                                                                                                                                                                                                                                                                                                                                                                                                                                                                                                                                                                                                                                                                                                                                                                                                                                                                                                                                                                                                                                                                                                                                                                                                                                                                                                                                                                                                                                                                                                                                                                                                                                                                         | 9                 | NeuAcα-3Galβ-3GlcNAcβ-3Galβ-4Glcβ-NH-Gly<br> <br>NeuAcα-6                                                 | Human milk (Likhosherstov et al. 2016)         |                   |                       |                |                           |  |  |  |          |   |                     |                                   |          |   |                         |                                        |            |   |                                    |          |               |   |                             |          |              |   |                           |                                        |              |   |                           |                                        |            |   |                                        |                                        |          |   |                                                   |                                        |           |   |                                                           |                                        |             |    |                                                                                                           |                                        |                |    |                         |                                |                  |    |                               |                                                |
|                                        | DSMFLNH-Gly                                                                                                                                                                                                                                                                                                                                                                                                                                                                                                                                                                                                                                                                                                                                                                                                                                                                                                                                                                                                                                                                                                                                                                                                                                                                                                                                                                                                                                                                                                                                                                                                                                                                                                                                                                                       | 10                | Galβ-4GlcNAcβ-6<br> <br>Fucα-3<br> <br>Galβ-4Glcβ-NH-Gly<br> <br>NeuAcα-3Galβ-3GlcNAcβ-3<br> <br>NeuAcα-6 | Human milk (Likhosherstov et al. 2016)         |                   |                       |                |                           |  |  |  |          |   |                     |                                   |          |   |                         |                                        |            |   |                                    |          |               |   |                             |          |              |   |                           |                                        |              |   |                           |                                        |            |   |                                        |                                        |          |   |                                                   |                                        |           |   |                                                           |                                        |             |    |                                                                                                           |                                        |                |    |                         |                                |                  |    |                               |                                                |
|                                        | ChitoBiase-Gly                                                                                                                                                                                                                                                                                                                                                                                                                                                                                                                                                                                                                                                                                                                                                                                                                                                                                                                                                                                                                                                                                                                                                                                                                                                                                                                                                                                                                                                                                                                                                                                                                                                                                                                                                                                    | 11                | GlcNAcβ-4GlcNAcβ-NH-Gly                                                                                   | Chitin (Nishimura et al. 1989)                 |                   |                       |                |                           |  |  |  |          |   |                     |                                   |          |   |                         |                                        |            |   |                                    |          |               |   |                             |          |              |   |                           |                                        |              |   |                           |                                        |            |   |                                        |                                        |          |   |                                                   |                                        |           |   |                                                           |                                        |             |    |                                                                                                           |                                        |                |    |                         |                                |                  |    |                               |                                                |
|                                        | Fuc(3)GlcNAc-Gly                                                                                                                                                                                                                                                                                                                                                                                                                                                                                                                                                                                                                                                                                                                                                                                                                                                                                                                                                                                                                                                                                                                                                                                                                                                                                                                                                                                                                                                                                                                                                                                                                                                                                                                                                                                  | 12                | GlcNAcβ-NH-Gly<br> <br>Fucα-3                                                                             | Chemical synthesis (Likhosherstov et al. 2015) |                   |                       |                |                           |  |  |  |          |   |                     |                                   |          |   |                         |                                        |            |   |                                    |          |               |   |                             |          |              |   |                           |                                        |              |   |                           |                                        |            |   |                                        |                                        |          |   |                                                   |                                        |           |   |                                                           |                                        |             |    |                                                                                                           |                                        |                |    |                         |                                |                  |    |                               |                                                |

|  |                      |    |                                                                                                                                                                                        |                                                  |
|--|----------------------|----|----------------------------------------------------------------------------------------------------------------------------------------------------------------------------------------|--------------------------------------------------|
|  | Fuc(6)GlcNAc-Gly     | 13 | Fuc $\alpha$ -6GlcNAc $\beta$ -NH-Gly                                                                                                                                                  | Chemical synthesis (Likhoshervostov et al. 2015) |
|  | DFuc(3,6)GlcNAc-Gly  | 14 | Fuc $\alpha$ -6GlcNAc $\beta$ -NH-Gly<br> <br>Fuc $\alpha$ -3                                                                                                                          | Chemical synthesis (Likhoshervostov et al. 2015) |
|  | Man5-Gly             | 15 | Man $\alpha$ -6<br> <br>Man $\alpha$ -3Man $\alpha$ -6<br> <br>Man $\beta$ -4GlcNAc $\beta$ -4GlcNAc $\beta$ -NH-Gly<br> <br>Man $\alpha$ -3                                           | Chicken egg white (Piskarev et al. 1990)         |
|  | Man6-Gly             | 16 | Man $\alpha$ -6<br> <br>Man $\alpha$ -3Man $\alpha$ -6<br> <br>Man $\beta$ -4GlcNAc $\beta$ -4GlcNAc $\beta$ -NH-Gly<br> <br>Man $\alpha$ -2Man $\alpha$ -3                            | Chicken egg white (Piskarev et al. 1990)         |
|  | NA2-Gly              | 17 | Gal $\beta$ -4GlcNAc $\beta$ -2Man $\alpha$ -6<br> <br>Man $\beta$ -4GlcNAc $\beta$ -4GlcNAc $\beta$ -NH-Gly<br> <br>Gal $\beta$ -4GlcNAc $\beta$ -2Man $\alpha$ -3                    | Chicken egg white (Piskarev et al. 1990)         |
|  | NA2F-Gly             | 18 | Gal $\beta$ -4GlcNAc $\beta$ -2Man $\alpha$ -6<br> <br>Man $\beta$ -4GlcNAc $\beta$ -4GlcNAc $\beta$ -NH-Gly<br> <br>Gal $\beta$ -4GlcNAc $\beta$ -2Man $\alpha$ -3<br>Fuc $\alpha$ -6 | Chicken egg white (Piskarev et al. 1990)         |
|  | SM1a-C3-N            | 19 | Gal $\beta$ -3GalNAc $\beta$ -4Gal $\beta$ -4Glc $\beta$ -O-C3-NH2<br> <br>SU-3                                                                                                        | W Chai and colleagues (submitted)                |
|  | SM1a(2S)-C3-N        | 20 | Gal $\beta$ -3GalNAc $\beta$ -4Gal $\beta$ -4Glc $\beta$ -O-C3-NH2<br> <br>SU-2                                                                                                        | W Chai and colleagues (submitted)                |
|  | GalNAc $\alpha$ -ON  | 21 | GalNAc $\alpha$ -O-NH2                                                                                                                                                                 | Elicityl                                         |
|  | GalNAc $\alpha$ -Ser | 22 | GalNAc $\alpha$ -O-Ser                                                                                                                                                                 | Sussex Research                                  |
|  | GalNAc $\alpha$ -Thr | 23 | GalNAc $\alpha$ -O-Thr                                                                                                                                                                 | Dextra Lab                                       |
|  | GalNAc $\beta$ -Ser  | 24 | GalNAc $\beta$ -O-Ser                                                                                                                                                                  | W Chai and colleagues (submitted)                |
|  | GalNAc $\beta$ -Thr  | 25 | GalNAc $\beta$ -O-Thr                                                                                                                                                                  | W Chai and colleagues (submitted)                |
|  | GlcNAc $\beta$ -Ser  | 26 | GlcNAc $\beta$ -O-Ser                                                                                                                                                                  | W Chai and colleagues (submitted)                |
|  | GlcNAc $\beta$ -Thr  | 27 | GlcNAc $\beta$ -O-Thr                                                                                                                                                                  | W Chai and colleagues (submitted)                |
|  | STn-Ser              | 28 | NeuAc $\alpha$ -6GalNAc $\alpha$ -O-Ser                                                                                                                                                | W Chai and colleagues (submitted)                |
|  | STn-Thr              | 29 | NeuAc $\alpha$ -6GalNAc $\alpha$ -O-Thr                                                                                                                                                | W Chai and colleagues (submitted)                |
|  | Core 1-Ser           | 30 | Gal $\beta$ -3GalNAc $\alpha$ -O-Ser                                                                                                                                                   | Dextra Lab                                       |
|  | Core 1-Thr           | 31 | Gal $\beta$ -3GalNAc $\alpha$ -O-Thr                                                                                                                                                   | Sussex Research                                  |
|  | SA1(2-3)-Core 1-Ser  | 32 | NeuAc $\alpha$ -3Gal $\beta$ -3GalNAc $\alpha$ -O-Ser                                                                                                                                  | W Chai and colleagues (submitted)                |
|  | SA1(2-3)-Core 1-Thr  | 33 | NeuAc $\alpha$ -3Gal $\beta$ -3GalNAc $\alpha$ -O-Thr                                                                                                                                  | W Chai and colleagues (submitted)                |
|  | SA1(2-6)-Core 1-Ser  | 34 | Gal $\beta$ -3GalNAc $\alpha$ -O-Ser<br> <br>NeuAc $\alpha$ -6                                                                                                                         | Human urine (Parkkinen and Finne 1983)           |
|  | SA1(2-6)-Core 1-Thr  | 35 | Gal $\beta$ -3GalNAc $\alpha$ -O-Thr<br> <br>NeuAc $\alpha$ -6                                                                                                                         | Human urine (Parkkinen and Finne 1983)           |
|  | SA2-Core 1-Ser       | 36 | NeuAc $\alpha$ -3Gal $\beta$ -3GalNAc $\alpha$ -O-Ser<br> <br>NeuAc $\alpha$ -6                                                                                                        | Human urine (Parkkinen and Finne 1983)           |
|  | SA2-Core 1-Thr       | 37 | NeuAc $\alpha$ -3Gal $\beta$ -3GalNAc $\alpha$ -O-Thr<br> <br>NeuAc $\alpha$ -6                                                                                                        | Human urine (Parkkinen and Finne 1983)           |
|  | Core 2-C3-N          | 38 | Gal $\beta$ -3GalNAc $\alpha$ -O-C3-NH2<br> <br>GlcNAc $\beta$ -6                                                                                                                      | Nicolai Bovin                                    |
|  | Core 2-Thr           | 39 | Gal $\beta$ -3GalNAc $\alpha$ -O-Thr<br> <br>GlcNAc $\beta$ -6                                                                                                                         | Sussex Research                                  |
|  | Core 3-Ser           | 40 | GlcNAc $\beta$ -3GalNAc $\alpha$ -O-Ser                                                                                                                                                | Sussex Research                                  |
|  | Core 3-Thr           | 41 | GlcNAc $\beta$ -3GalNAc $\alpha$ -O-Thr                                                                                                                                                | Sussex Research                                  |
|  | Gal-Core 3-Ser       | 42 | Gal $\beta$ -4GlcNAc $\beta$ -3GalNAc $\alpha$ -O-Ser                                                                                                                                  | W Chai and colleagues (submitted)                |

|                                               |    |                                                                                                                                                                                                                                                                                  |                                                  |
|-----------------------------------------------|----|----------------------------------------------------------------------------------------------------------------------------------------------------------------------------------------------------------------------------------------------------------------------------------|--------------------------------------------------|
| Gal(3S)-Core 3-Ser                            | 43 | Gal (3S) $\beta$ -4GlcNAc $\beta$ -3GalNAc $\alpha$ -O-Ser                                                                                                                                                                                                                       | W Chai and colleagues (submitted)                |
| GalNAc-G(3S)-Core 3-Ser                       | 44 | GalNAc $\beta$ -4Gal (3S) $\beta$ -4GlcNAc $\beta$ -3GalNAc $\alpha$ -O-Ser                                                                                                                                                                                                      | W Chai and colleagues (submitted)                |
| GSC 967-Ser                                   | 45 | Gal $\beta$ -3GalNAc $\beta$ -4Gal (3S) $\beta$ -4GlcNAc $\beta$ -3GalNAc $\alpha$ -O-Ser                                                                                                                                                                                        | W Chai and colleagues (submitted)                |
| Core 4-C3-N                                   | 46 | GlcNAc $\beta$ -3GalNAc $\alpha$ -O-C3-NH <sub>2</sub><br> <br>GlcNAc $\beta$ -6                                                                                                                                                                                                 | Nicolai Bovin                                    |
| Core 4-Thr                                    | 47 | GlcNAc $\beta$ -3GalNAc $\alpha$ -O-Thr<br> <br>GlcNAc $\beta$ -6                                                                                                                                                                                                                | Sussex Research                                  |
| Man-PentaPep                                  | 48 | YAT (Man) AV                                                                                                                                                                                                                                                                     | Chemical synthesis (Bartels et al. 2016)         |
| Man-HexaPep                                   | 49 | CYAT (Man) AV-NMe                                                                                                                                                                                                                                                                | Chemical synthesis (Bartels et al. 2016)         |
| Man-UndecaPep                                 | 50 | Sp-TriEG-SQSLEET (Man) ISPR                                                                                                                                                                                                                                                      | Chemical synthesis (Bartels et al. 2016)         |
| Hep-4-NAc-PhN                                 | 51 | GlcNAc $\alpha$ -4GlcA $\beta$ -4GlcNAc $\alpha$ -4GlcA $\beta$ -O-Ph-NH <sub>2</sub>                                                                                                                                                                                            | Chemo-enzymatic synthesis (Jian Liu)             |
| Hep-4-NS-PhN                                  | 52 | GlcNS $\alpha$ -4GlcA $\beta$ -4GlcNS $\alpha$ -4GlcA $\beta$ -O-Ph-NH <sub>2</sub>                                                                                                                                                                                              | Chemo-enzymatic synthesis (Jian Liu)             |
| Glc12-C5-N                                    | 53 | Glc $\beta$ -3Glc $\beta$ -3Glc $\beta$ -3Glc $\beta$ -[3Glc $\beta$ -3Glc $\beta$ ] <sub>3</sub> -3Glc $\beta$ -3Glc $\beta$ -O-C5-NH <sub>2</sub>                                                                                                                              | Chemical synthesis (Weishaupt et al. 2013, 2017) |
| Glc15-C2-N                                    | 54 | Glc $\beta$ -3Glc $\beta$ -3Glc $\beta$ -3Glc $\beta$ -[3Glc $\beta$ -3Glc $\beta$ ] <sub>3</sub> -3Glc $\beta$ -3Glc $\beta$ -3Glc $\beta$ -3Glc $\beta$ -3Glc $\beta$ -O-C2-NH <sub>2</sub>                                                                                    | Chemical synthesis Novartis                      |
| Glc13(B10)-C5-N                               | 55 | Glc $\beta$ -3Glc $\beta$ -3Glc $\beta$ -3Glc $\beta$ -[3Glc $\beta$ -3Glc $\beta$ ] <sub>3</sub> -3Glc $\beta$ -3Glc $\beta$ -O-C5-NH <sub>2</sub><br> <br>Glc $\beta$ -6                                                                                                       | Chemical synthesis (Weishaupt et al. 2013, 2017) |
| Gal-C2-N                                      | 56 | Gal $\beta$ -O-C2-NH <sub>2</sub>                                                                                                                                                                                                                                                | W Chai and colleagues (submitted)                |
| Gal-Ph-N                                      | 57 | Gal $\beta$ -O-Ph-NH <sub>2</sub>                                                                                                                                                                                                                                                | W Chai and colleagues (submitted)                |
| Glc-C2-N                                      | 58 | Glc $\beta$ -O-C2-NH <sub>2</sub>                                                                                                                                                                                                                                                | W Chai and colleagues (submitted)                |
| Man-C2-N                                      | 59 | Man $\beta$ -O-C2-NH <sub>2</sub>                                                                                                                                                                                                                                                | W Chai and colleagues (submitted)                |
| Xyl-C2-N                                      | 60 | Xyl $\beta$ -O-C2-NH <sub>2</sub>                                                                                                                                                                                                                                                | W Chai and colleagues (submitted)                |
| <b>Reducing glycans and glycosylceramides</b> |    |                                                                                                                                                                                                                                                                                  |                                                  |
| Lac                                           | 61 | Gal $\beta$ -4Glc                                                                                                                                                                                                                                                                | (Palma et al. 2011; Vendele et al. 2020)         |
| B-Tetra-T2                                    | 62 | Gal $\alpha$ -3Gal $\beta$ -4GlcNAc<br> <br>Fuc $\alpha$ -2                                                                                                                                                                                                                      | W Chai and colleagues (submitted)                |
| NeuAc $\alpha$ -(3')Lac                       | 63 | NeuAc $\alpha$ -3Gal $\beta$ -4Glc                                                                                                                                                                                                                                               | (Palma et al. 2011; Vendele et al. 2020)         |
| LNFP-I                                        | 64 | Fuc $\alpha$ -2Gal $\beta$ -3GlcNAc $\beta$ -3Gal $\beta$ -4Glc                                                                                                                                                                                                                  | (Palma et al. 2011; Vendele et al. 2020)         |
| LNFP-III                                      | 65 | Gal $\beta$ -4GlcNAc $\beta$ -3Gal $\beta$ -4Glc<br> <br>Fuc $\alpha$ -3                                                                                                                                                                                                         | (Palma et al. 2011; Vendele et al. 2020)         |
| LSTb                                          | 66 | Gal $\beta$ -3GlcNAc $\beta$ -3Gal $\beta$ -4Glc<br> <br>NeuAc $\alpha$ -6                                                                                                                                                                                                       | (Palma et al. 2011; Vendele et al. 2020)         |
| H2 (with H2+Fuc)                              | 67 | Fuc $\alpha$ -2Gal $\beta$ -4GlcNAc $\beta$ -3Gal $\beta$ -4GlcNAc $\beta$ -3Gal $\beta$ -4Glc( $\beta$ -Cer)*                                                                                                                                                                   | (Gao et al. 2014)                                |
| TFILNO                                        | 68 | Gal $\beta$ -3GlcNAc $\beta$ -3Gal $\beta$ -4GlcNAc $\beta$ -6<br>                                               <br>Fuc $\alpha$ -4                      Fuc $\alpha$ -3                      Gal $\beta$ -4Glc<br> <br>Gal $\beta$ -3GlcNAc $\beta$ -3<br> <br>Fuc $\alpha$ -4 | (Palma et al. 2011; Vendele et al. 2020)         |
| SM1a                                          | 69 | Gal $\beta$ -3GalNAc $\beta$ -4Gal $\beta$ -4Glc( $\beta$ -Cer)<br> <br>SU-3                                                                                                                                                                                                     | (Palma et al. 2011; Vendele et al. 2020)         |
| Asialo-GM1-Tetra                              | 70 | Gal $\beta$ -3GalNAc $\beta$ -4Gal $\beta$ -4Glc                                                                                                                                                                                                                                 | (Palma et al. 2011; Vendele et al. 2020)         |
| SB1a                                          | 71 | SU-3Gal $\beta$ -3GalNAc $\beta$ -4Gal $\beta$ -4Glc( $\beta$ -Cer)<br> <br>SU-3                                                                                                                                                                                                 | (Palma et al. 2011; Vendele et al. 2020)         |
| GalNAc-Ser                                    | 72 | GalNAc $\alpha$ -Ser                                                                                                                                                                                                                                                             | (Palma et al. 2011; Vendele et al. 2020)         |
| GalNAc-Thr                                    | 73 | GalNAc $\alpha$ -Thr                                                                                                                                                                                                                                                             | (Palma et al. 2011; Vendele et al. 2020)         |
| BSM-Di-A1                                     | 74 | NeuGc $\alpha$ -6GalNAc                                                                                                                                                                                                                                                          | (Chai et al. 1992)                               |
| BSM-Di-A2                                     | 75 | NeuAc $\alpha$ -6GalNAc                                                                                                                                                                                                                                                          | (Chai et al. 1992)                               |
| Gal $\beta$ -3GalNAc                          | 76 | Gal $\beta$ -3GalNAc                                                                                                                                                                                                                                                             | (Palma et al. 2011; Vendele et al. 2020)         |
| Gal $\beta$ -6GalNAc                          | 77 | Gal $\beta$ -6GalNAc                                                                                                                                                                                                                                                             | (Palma et al. 2011; Vendele et al. 2020)         |

|                                                                                                                                                                                                                                                                                                                                                                                                                                                            |                                                                                                                                                                                                                                                                                                                                                                                                                                                                                                                                                                                                                                                                                                                           |         |    |                                                                                                                                      |                                             |
|------------------------------------------------------------------------------------------------------------------------------------------------------------------------------------------------------------------------------------------------------------------------------------------------------------------------------------------------------------------------------------------------------------------------------------------------------------|---------------------------------------------------------------------------------------------------------------------------------------------------------------------------------------------------------------------------------------------------------------------------------------------------------------------------------------------------------------------------------------------------------------------------------------------------------------------------------------------------------------------------------------------------------------------------------------------------------------------------------------------------------------------------------------------------------------------------|---------|----|--------------------------------------------------------------------------------------------------------------------------------------|---------------------------------------------|
|                                                                                                                                                                                                                                                                                                                                                                                                                                                            |                                                                                                                                                                                                                                                                                                                                                                                                                                                                                                                                                                                                                                                                                                                           | DST     | 78 | NeuAc $\alpha$ -3Gal $\beta$ -3GalNAc<br> <br>NeuAc $\alpha$ -6                                                                      | (Palma et al. 2011;<br>Vendele et al. 2020) |
|                                                                                                                                                                                                                                                                                                                                                                                                                                                            |                                                                                                                                                                                                                                                                                                                                                                                                                                                                                                                                                                                                                                                                                                                           | Curd-13 | 79 | Glc $\beta$ -3Glc $\beta$ -3Glc $\beta$ -3Glc $\beta$ -[3Glc $\beta$ -3Glc $\beta$ ] <sub>3</sub> -3Glc $\beta$ -3Glc $\beta$ -3Glc* | (Palma et al. 2015)                         |
|                                                                                                                                                                                                                                                                                                                                                                                                                                                            |                                                                                                                                                                                                                                                                                                                                                                                                                                                                                                                                                                                                                                                                                                                           | Cello-3 | 80 | Glc $\beta$ -4Glc $\beta$ -4Glc                                                                                                      | (Palma et al. 2015)                         |
|                                                                                                                                                                                                                                                                                                                                                                                                                                                            |                                                                                                                                                                                                                                                                                                                                                                                                                                                                                                                                                                                                                                                                                                                           | GN2     | 81 | GlcNAc $\beta$ -4GlcNAc                                                                                                              | (Palma et al. 2011;<br>Vendele et al. 2020) |
|                                                                                                                                                                                                                                                                                                                                                                                                                                                            |                                                                                                                                                                                                                                                                                                                                                                                                                                                                                                                                                                                                                                                                                                                           | GN6     | 82 | GlcNAc $\beta$ -4GlcNAc $\beta$ -4GlcNAc $\beta$ -4GlcNAc $\beta$ -4GlcNAc $\beta$ -4GlcNAc*                                         | (Vendele et al. 2020)                       |
| <sup>a</sup> Pos, position in the microarray with glycans sorted according to backbone type.<br><sup>b</sup> Abbreviations of reducing terminal structures: Gly, glycine; Ph, phenyl; Ser, serine; Thr, threonine; C2, -CH <sub>2</sub> -CH <sub>2</sub> -; C3, -CH <sub>2</sub> -CH <sub>2</sub> -CH <sub>2</sub> -; C5, -CH <sub>2</sub> -(CH <sub>2</sub> ) <sub>3</sub> -CH <sub>2</sub> -.<br>*Asterisks indicate that major components are depicted. |                                                                                                                                                                                                                                                                                                                                                                                                                                                                                                                                                                                                                                                                                                                           |         |    |                                                                                                                                      |                                             |
| Glycan description for undefined glycans                                                                                                                                                                                                                                                                                                                                                                                                                   | Not applicable.                                                                                                                                                                                                                                                                                                                                                                                                                                                                                                                                                                                                                                                                                                           |         |    |                                                                                                                                      |                                             |
| Glycan modifications                                                                                                                                                                                                                                                                                                                                                                                                                                       | <p>The amino-terminating glycans were conjugated to a new aldehyde-functionalized phospholipid reagent <i>N</i>-(4-formylbenzamide)-1,2-dihexadecyl-<i>sn</i>-glycero-3-phosphoethanolamine, abbreviated to DA (W Chai and colleagues, submitted). The NGLs were designated DA-NGLs.</p> <p>DH, NGLs, prepared from reducing oligosaccharides by reductive amination with the amino lipid, 1,2-dihexadecyl-<i>sn</i>-glycero-3-phosphoethanolamine [(DHPE) (<a href="#">Chai et al., Methods Enzymol. 2003</a>)](Chai et al. 2003); AO, NGLs prepared from reducing oligosaccharides by oxime ligation with an aminooxy functionalized DHPE [(AOPE) (<a href="#">Liu et al., Chem. Biol. 2007</a>)](Liu et al. 2007).</p> |         |    |                                                                                                                                      |                                             |
| 3. Printing Surface; e.g., Microarray Slide                                                                                                                                                                                                                                                                                                                                                                                                                |                                                                                                                                                                                                                                                                                                                                                                                                                                                                                                                                                                                                                                                                                                                           |         |    |                                                                                                                                      |                                             |
| Description of surface                                                                                                                                                                                                                                                                                                                                                                                                                                     | Nitrocellulose-coated glass microarray slides.                                                                                                                                                                                                                                                                                                                                                                                                                                                                                                                                                                                                                                                                            |         |    |                                                                                                                                      |                                             |
| Manufacturer                                                                                                                                                                                                                                                                                                                                                                                                                                               | 16-pad UniSart® 3D Microarray Slide from Sartorius (Goettingen, Germany).                                                                                                                                                                                                                                                                                                                                                                                                                                                                                                                                                                                                                                                 |         |    |                                                                                                                                      |                                             |
| Custom preparation of surface                                                                                                                                                                                                                                                                                                                                                                                                                              | Not relevant.                                                                                                                                                                                                                                                                                                                                                                                                                                                                                                                                                                                                                                                                                                             |         |    |                                                                                                                                      |                                             |
| Non-covalent Immobilization                                                                                                                                                                                                                                                                                                                                                                                                                                | <p>The lipid-linked oligosaccharide probes were formulated as liposomes by adding carrier lipids, 1,2-dihexanoyl-<i>sn</i>-glycero-3-phosphocholine (DHPC) and cholesterol for arraying and non-covalent immobilization on nitrocellulose-coated glass slides (<a href="#">Liu et al., Methods Mol. Biol. 2012</a>)(Liu et al. 2012).</p>                                                                                                                                                                                                                                                                                                                                                                                 |         |    |                                                                                                                                      |                                             |
| 4. Arrayer (Printer)                                                                                                                                                                                                                                                                                                                                                                                                                                       |                                                                                                                                                                                                                                                                                                                                                                                                                                                                                                                                                                                                                                                                                                                           |         |    |                                                                                                                                      |                                             |
| Description of Arrayer                                                                                                                                                                                                                                                                                                                                                                                                                                     | Nano-Plotter 2.1 (GeSiM, Radeberg, Germany).                                                                                                                                                                                                                                                                                                                                                                                                                                                                                                                                                                                                                                                                              |         |    |                                                                                                                                      |                                             |
| Dispensing mechanism                                                                                                                                                                                                                                                                                                                                                                                                                                       | Non-contact liquid delivery with four dispensing tips.                                                                                                                                                                                                                                                                                                                                                                                                                                                                                                                                                                                                                                                                    |         |    |                                                                                                                                      |                                             |
| Glycan deposition                                                                                                                                                                                                                                                                                                                                                                                                                                          | <p>Approximately 0.33 nl was printed per spot.</p> <p>Each glycan probe was printed at 2 levels (2 and 5 fmol per spot), in duplicate.</p>                                                                                                                                                                                                                                                                                                                                                                                                                                                                                                                                                                                |         |    |                                                                                                                                      |                                             |
| Printing conditions                                                                                                                                                                                                                                                                                                                                                                                                                                        | <p>The printing solutions were aqueous-based. Printing was performed at ambient temperature and relative humidity of 58%.</p> <p>The NGL printing solutions contained 100 pmol/μl of DHPC and cholesterol (both from SIGMA) as lipid carriers in addition to the lipid-linked glycan probes. The concentrations of the NGL probes were 5 and 15 pmol/μl for the 2 and 5 fmol per spot levels, respectively.</p> <p>The printing solutions also contained Cy3 NHS ester (GE Healthcare) at 20 ng/ml (26 fmol/μl) as a marker to monitor the printing process.</p>                                                                                                                                                          |         |    |                                                                                                                                      |                                             |
| 5. Glycan Microarray with “Map”                                                                                                                                                                                                                                                                                                                                                                                                                            |                                                                                                                                                                                                                                                                                                                                                                                                                                                                                                                                                                                                                                                                                                                           |         |    |                                                                                                                                      |                                             |

| Array layout                                          | Each array slide contained 16-pad subarrays. Each pad was set up for printing 64 probes maximum, each at 2 levels in duplicate (four spots for one probe in a row); up to 256 spots (16x16) in total for each subarray. The probes were printed on multiple subarrays for parallel binding analyses.                                                                                                                                                                                                                                                                                                                                                                                                                                                                                                                                                                                                             |                           |             |                           |  |              |             |              |             |  |  |  |  |  |  |  |  |  |  |  |  |  |  |  |  |  |  |  |  |  |  |  |  |  |  |  |  |
|-------------------------------------------------------|------------------------------------------------------------------------------------------------------------------------------------------------------------------------------------------------------------------------------------------------------------------------------------------------------------------------------------------------------------------------------------------------------------------------------------------------------------------------------------------------------------------------------------------------------------------------------------------------------------------------------------------------------------------------------------------------------------------------------------------------------------------------------------------------------------------------------------------------------------------------------------------------------------------|---------------------------|-------------|---------------------------|--|--------------|-------------|--------------|-------------|--|--|--|--|--|--|--|--|--|--|--|--|--|--|--|--|--|--|--|--|--|--|--|--|--|--|--|--|
| Glycan identification and quality control             | Quality control was performed with sequence-specific proteins: biotinylated plant lectins - Wheat Germ Agglutinin (WGA), <i>Vicia Villosa</i> Lectin (VVL), Peanut agglutinin (PNA), <i>Helix pomatia</i> lectin (HPA), <i>Ricinus Communis</i> agglutinin I (RCA <sub>120</sub> ), Concanavalin A (ConA) and <i>Aleuria aurantia</i> lectin (AAL) (Vector Laboratories); Fc-tagged-MGL (CLEC10A) (Abcam); his-tagged carbohydrate-binding modules of bacterial glycoside hydrolases ( <i>CmCBM6-2</i> , <i>TmCBM4-2</i> ); CTD110.6 – anti-O-GlcNAc (Santa Cruz) and anti-blood group H monoclonal antibodies (17-206, BRIC231) (Abcam) (W Chai and colleagues, submitted)                                                                                                                                                                                                                                      |                           |             |                           |  |              |             |              |             |  |  |  |  |  |  |  |  |  |  |  |  |  |  |  |  |  |  |  |  |  |  |  |  |  |  |  |  |
| 6. Detector and Data Processing                       |                                                                                                                                                                                                                                                                                                                                                                                                                                                                                                                                                                                                                                                                                                                                                                                                                                                                                                                  |                           |             |                           |  |              |             |              |             |  |  |  |  |  |  |  |  |  |  |  |  |  |  |  |  |  |  |  |  |  |  |  |  |  |  |  |  |
| Scanning hardware                                     | GenePix 4300A (Molecular Devices)                                                                                                                                                                                                                                                                                                                                                                                                                                                                                                                                                                                                                                                                                                                                                                                                                                                                                |                           |             |                           |  |              |             |              |             |  |  |  |  |  |  |  |  |  |  |  |  |  |  |  |  |  |  |  |  |  |  |  |  |  |  |  |  |
| Scanner settings                                      | Scanning resolution: 10 μm / pixel;<br>Laser channel: red (scan wavelength 635nm);<br>PMT Voltages: 350<br>Scan power: Adjusted for each sample to achieve maximum signal without saturation of any single spot.                                                                                                                                                                                                                                                                                                                                                                                                                                                                                                                                                                                                                                                                                                 |                           |             |                           |  |              |             |              |             |  |  |  |  |  |  |  |  |  |  |  |  |  |  |  |  |  |  |  |  |  |  |  |  |  |  |  |  |
| Image analysis software                               | GenePix® Pro 7 (Molecular Devices)                                                                                                                                                                                                                                                                                                                                                                                                                                                                                                                                                                                                                                                                                                                                                                                                                                                                               |                           |             |                           |  |              |             |              |             |  |  |  |  |  |  |  |  |  |  |  |  |  |  |  |  |  |  |  |  |  |  |  |  |  |  |  |  |
| Data processing                                       | The gpr file was entered into an in-house microarray database using software (designed by Mark Stoll, <a href="http://www.beilstein-institut.de/en/publications/proceedings/glyco-2009">http://www.beilstein-institut.de/en/publications/proceedings/glyco-2009</a> ) for data processing. No particular normalization method or statistical analysis was used.                                                                                                                                                                                                                                                                                                                                                                                                                                                                                                                                                  |                           |             |                           |  |              |             |              |             |  |  |  |  |  |  |  |  |  |  |  |  |  |  |  |  |  |  |  |  |  |  |  |  |  |  |  |  |
| 7. Glycan Microarray Data Presentation                |                                                                                                                                                                                                                                                                                                                                                                                                                                                                                                                                                                                                                                                                                                                                                                                                                                                                                                                  |                           |             |                           |  |              |             |              |             |  |  |  |  |  |  |  |  |  |  |  |  |  |  |  |  |  |  |  |  |  |  |  |  |  |  |  |  |
| Data presentation                                     | In Figure 4, the binding results are presented as 2D bar graphs with bars representing averaged mean signal of duplicate spots at 5 fmol/spot and error bars representing standard deviation. The fluorescence intensity numerical scores are depicted in <b>Supplementary Table S2</b> .                                                                                                                                                                                                                                                                                                                                                                                                                                                                                                                                                                                                                        |                           |             |                           |  |              |             |              |             |  |  |  |  |  |  |  |  |  |  |  |  |  |  |  |  |  |  |  |  |  |  |  |  |  |  |  |  |
| 8. Interpretation and Conclusion from Microarray Data |                                                                                                                                                                                                                                                                                                                                                                                                                                                                                                                                                                                                                                                                                                                                                                                                                                                                                                                  |                           |             |                           |  |              |             |              |             |  |  |  |  |  |  |  |  |  |  |  |  |  |  |  |  |  |  |  |  |  |  |  |  |  |  |  |  |
| Data interpretation                                   | No software or algorithms were used to interpret processed data.                                                                                                                                                                                                                                                                                                                                                                                                                                                                                                                                                                                                                                                                                                                                                                                                                                                 |                           |             |                           |  |              |             |              |             |  |  |  |  |  |  |  |  |  |  |  |  |  |  |  |  |  |  |  |  |  |  |  |  |  |  |  |  |
| Conclusions                                           | <p>Human Siglec-15 is shown to bind to sialylated glycans apart from sTn. Mutation of the conserved Arg143 that is critical for interaction with sialic acid to Ala markedly reduced but not abolished the binding. The binding of hSiglec-15 contrasts with the restricted binding observed with the 3F1-IgG antibody to the sTn antigen.</p> <table><thead><tr><th colspan="2">hSiglec-15 ligands</th><th colspan="2">Anti-STn 3F1 determinants</th></tr><tr><th>High avidity</th><th>Low avidity</th><th>High avidity</th><th>Low avidity</th></tr></thead><tbody><tr><td></td><td></td><td></td><td></td></tr><tr><td></td><td></td><td></td><td></td></tr><tr><td></td><td></td><td></td><td></td></tr><tr><td></td><td></td><td></td><td></td></tr><tr><td></td><td></td><td></td><td></td></tr><tr><td></td><td></td><td></td><td></td></tr><tr><td></td><td></td><td></td><td></td></tr></tbody></table> | hSiglec-15 ligands        |             | Anti-STn 3F1 determinants |  | High avidity | Low avidity | High avidity | Low avidity |  |  |  |  |  |  |  |  |  |  |  |  |  |  |  |  |  |  |  |  |  |  |  |  |  |  |  |  |
| hSiglec-15 ligands                                    |                                                                                                                                                                                                                                                                                                                                                                                                                                                                                                                                                                                                                                                                                                                                                                                                                                                                                                                  | Anti-STn 3F1 determinants |             |                           |  |              |             |              |             |  |  |  |  |  |  |  |  |  |  |  |  |  |  |  |  |  |  |  |  |  |  |  |  |  |  |  |  |
| High avidity                                          | Low avidity                                                                                                                                                                                                                                                                                                                                                                                                                                                                                                                                                                                                                                                                                                                                                                                                                                                                                                      | High avidity              | Low avidity |                           |  |              |             |              |             |  |  |  |  |  |  |  |  |  |  |  |  |  |  |  |  |  |  |  |  |  |  |  |  |  |  |  |  |
|                                                       |                                                                                                                                                                                                                                                                                                                                                                                                                                                                                                                                                                                                                                                                                                                                                                                                                                                                                                                  |                           |             |                           |  |              |             |              |             |  |  |  |  |  |  |  |  |  |  |  |  |  |  |  |  |  |  |  |  |  |  |  |  |  |  |  |  |
|                                                       |                                                                                                                                                                                                                                                                                                                                                                                                                                                                                                                                                                                                                                                                                                                                                                                                                                                                                                                  |                           |             |                           |  |              |             |              |             |  |  |  |  |  |  |  |  |  |  |  |  |  |  |  |  |  |  |  |  |  |  |  |  |  |  |  |  |
|                                                       |                                                                                                                                                                                                                                                                                                                                                                                                                                                                                                                                                                                                                                                                                                                                                                                                                                                                                                                  |                           |             |                           |  |              |             |              |             |  |  |  |  |  |  |  |  |  |  |  |  |  |  |  |  |  |  |  |  |  |  |  |  |  |  |  |  |
|                                                       |                                                                                                                                                                                                                                                                                                                                                                                                                                                                                                                                                                                                                                                                                                                                                                                                                                                                                                                  |                           |             |                           |  |              |             |              |             |  |  |  |  |  |  |  |  |  |  |  |  |  |  |  |  |  |  |  |  |  |  |  |  |  |  |  |  |
|                                                       |                                                                                                                                                                                                                                                                                                                                                                                                                                                                                                                                                                                                                                                                                                                                                                                                                                                                                                                  |                           |             |                           |  |              |             |              |             |  |  |  |  |  |  |  |  |  |  |  |  |  |  |  |  |  |  |  |  |  |  |  |  |  |  |  |  |
|                                                       |                                                                                                                                                                                                                                                                                                                                                                                                                                                                                                                                                                                                                                                                                                                                                                                                                                                                                                                  |                           |             |                           |  |              |             |              |             |  |  |  |  |  |  |  |  |  |  |  |  |  |  |  |  |  |  |  |  |  |  |  |  |  |  |  |  |
|                                                       |                                                                                                                                                                                                                                                                                                                                                                                                                                                                                                                                                                                                                                                                                                                                                                                                                                                                                                                  |                           |             |                           |  |              |             |              |             |  |  |  |  |  |  |  |  |  |  |  |  |  |  |  |  |  |  |  |  |  |  |  |  |  |  |  |  |

**Supplementary Table SII.** List of the lipid-linked glycan probes included in microarrays and the fluorescence binding intensities elicited with human Siglec-15 proteins and 3F1 antibody.

|                         |      |                                                                                                                                   | Fluorescence intensities <sup>3</sup><br>(5fmol/spot) |                         |                     |
|-------------------------|------|-----------------------------------------------------------------------------------------------------------------------------------|-------------------------------------------------------|-------------------------|---------------------|
| Probe name <sup>1</sup> | Pos. | Probe Sequence <sup>2</sup>                                                                                                       | hSiglec-15<br>WT                                      | hSiglec-15<br>Arg143Ala | Anti-STn<br>3F1-IgG |
| DA-NGLs                 |      |                                                                                                                                   |                                                       |                         |                     |
| Lac-C2-N-               | 1    | Galβ-4Glcβ-O-C2-NX-DA                                                                                                             | -                                                     | -                       |                     |
| 2'FL-Gly-               | 2    | Fucα-2Galβ-4Glc-NH-Gly-NH-DA                                                                                                      | -                                                     | -                       | -                   |
| B-tri-C3-N-             | 3    | Galα-3Galβ-O-C3-NX-DA<br> <br>Fucα-2                                                                                              | -                                                     | -                       | -                   |
| 3'SA-Lac-C2-N-          | 4    | NeuAcα-3Galβ-4Glcβ-O-C3-NX-DA                                                                                                     | -                                                     | -                       | -                   |
| 3'SA-Lac-Gly-           | 5    | NeuAcα-3Galβ-4Glcβ-NH-Gly-NH-DA                                                                                                   | 1 451                                                 | -                       | -                   |
| 6'SA-Lac-Gly-           | 6    | NeuAcα-6Galβ-4Glcβ-NH-Gly-NH-DA                                                                                                   | 451                                                   | -                       | -                   |
| LNFP I-Gly-             | 7    | Fucα-2Galβ-3GlcNAcβ-3Galβ-4Glc-NH-Gly-NH-DA                                                                                       | -                                                     | -                       | -                   |
| LSTb-Gly-               | 8    | Galβ-3GlcNAcβ-3Galβ-4Glcβ-NH-Gly-NH-DA<br> <br>NeuAcα-6                                                                           | 4 766                                                 | -                       | -                   |
| DSLNT-Gly-              | 9    | NeuAcα-3Galβ-3GlcNAcβ-3Galβ-4Glcβ-NH-Gly-NH-DA<br> <br>NeuAcα-6                                                                   | 4 597                                                 | -                       | -                   |
| DSMFLNH-Gly-            | 10   | Galβ-4GlcNAcβ-6<br> <br>Fucα-3                       <br>Galβ-4Glcβ-NH-Gly-NH-DA<br> <br>NeuAcα-3Galβ-3GlcNAcβ-3<br> <br>NeuAcα-6 | 6 347                                                 | 759                     | -                   |
| ChitoBiose-Gly-         | 11   | GlcNAcβ-4GlcNAcβ-NH-Gly-NH-DA                                                                                                     | -                                                     | -                       | -                   |
| Fuc(3)GlcNAc-Gly-       | 12   | GlcNAcβ-NH-Gly-NH-DA<br> <br>Fucα-3                                                                                               | -                                                     | -                       | -                   |
| Fuc(6)GlcNAc-Gly-       | 13   | Fucα-6GlcNAcβ-NH-Gly-NH-DA                                                                                                        | -                                                     | -                       | -                   |
| DFuc(3,6)GlcNAc-Gly-    | 14   | Fucα-6GlcNAcβ-NH-Gly-NH-DA<br> <br>Fucα-3                                                                                         | -                                                     | -                       | -                   |

|                       |    |                                                                                                                                                                                                                                                                                                                            |       |     |       |
|-----------------------|----|----------------------------------------------------------------------------------------------------------------------------------------------------------------------------------------------------------------------------------------------------------------------------------------------------------------------------|-------|-----|-------|
| Man5-Gly-             | 15 | $  \begin{array}{c}  \text{Man}\alpha\text{-6} \\    \\  \text{Man}\alpha\text{-3Man}\alpha\text{-6} \\    \\  \text{Man}\beta\text{-4GlcNAc}\beta\text{-4GlcNAc}\beta\text{-NH-Gly-NH-DA} \\    \\  \text{Man}\alpha\text{-3}  \end{array}  $                                                                             | -     | -   | -     |
| Man6-Gly-             | 16 | $  \begin{array}{c}  \text{Man}\alpha\text{-6} \\    \\  \text{Man}\alpha\text{-3Man}\alpha\text{-6} \\    \\  \text{Man}\beta\text{-4GlcNAc}\beta\text{-4GlcNAc}\beta\text{-NH-Gly-NH-DA} \\    \\  \text{Man}\alpha\text{-2Man}\alpha\text{-3}  \end{array}  $                                                           | -     | -   | -     |
| NA2-Gly-              | 17 | $  \begin{array}{c}  \text{Gal}\beta\text{-4GlcNAc}\beta\text{-2Man}\alpha\text{-6} \\    \\  \text{Man}\beta\text{-4GlcNAc}\beta\text{-4GlcNAc}\beta\text{-NH-Gly-NH-DA} \\    \\  \text{Gal}\beta\text{-4GlcNAc}\beta\text{-2Man}\alpha\text{-3}  \end{array}  $                                                         | -     | -   | -     |
| NA2F-Gly-             | 18 | $  \begin{array}{c}  \text{Gal}\beta\text{-4GlcNAc}\beta\text{-2Man}\alpha\text{-6} \qquad \text{Fuc}\alpha\text{-6} \\    \qquad \qquad \qquad   \\  \text{Man}\beta\text{-4GlcNAc}\beta\text{-4GlcNAc}\beta\text{-NH-Gly-NH-DA} \\    \\  \text{Gal}\beta\text{-4GlcNAc}\beta\text{-2Man}\alpha\text{-3}  \end{array}  $ | -     | -   | -     |
| SM1a-C3-N-            | 19 | $  \begin{array}{c}  \text{Gal}\beta\text{-3GalNAc}\beta\text{-4Gal}\beta\text{-4Glc}\beta\text{-O-C3-NH-DA} \\    \\  \text{SU-3}  \end{array}  $                                                                                                                                                                         | -     | -   | -     |
| SM1a(2S)-C3-N-        | 20 | $  \begin{array}{c}  \text{Gal}\beta\text{-3GalNAc}\beta\text{-4Gal}\beta\text{-4Glc}\beta\text{-O-C3-NH-DA} \\    \\  \text{SU-2}  \end{array}  $                                                                                                                                                                         | -     | -   | -     |
| GalNAc $\alpha$ -ON-  | 21 | GalNAc $\alpha$ -O-N=DA                                                                                                                                                                                                                                                                                                    | -     | -   | -     |
| GalNAc $\alpha$ -Ser- | 22 | GalNAc $\alpha$ -O-Ser-NH-DA                                                                                                                                                                                                                                                                                               | -     | -   | -     |
| GalNAc $\alpha$ -Thr- | 23 | GalNAc $\alpha$ -O-Thr-NH-DA                                                                                                                                                                                                                                                                                               | -     | -   | -     |
| GalNAc $\beta$ -Ser-  | 24 | GalNAc $\beta$ -O-Ser-NH-DA                                                                                                                                                                                                                                                                                                | -     | -   | -     |
| GalNAc $\beta$ -Thr-  | 25 | GalNAc $\beta$ -O-Thr-NH-DA                                                                                                                                                                                                                                                                                                | -     | -   | -     |
| GlcNAc $\beta$ -Ser-  | 26 | GlcNAc $\beta$ -O-Ser-NH-DA                                                                                                                                                                                                                                                                                                | -     | -   | -     |
| GlcNAc $\beta$ -Thr-  | 27 | GlcNAc $\beta$ -O-Thr-NH-DA                                                                                                                                                                                                                                                                                                | -     | -   | -     |
| STn-Ser-              | 28 | NeuAc $\alpha$ -6GalNAc $\alpha$ -O-Ser-NH-DA                                                                                                                                                                                                                                                                              | 1 687 | 410 | 8 226 |
| STn-Thr-              | 29 | NeuAc $\alpha$ -6GalNAc $\alpha$ -O-Thr-NH-DA                                                                                                                                                                                                                                                                              | 543   | -   | 789   |
| Core 1-Ser-           | 30 | Gal $\beta$ -3GalNAc $\alpha$ -O-Ser-NH-DA                                                                                                                                                                                                                                                                                 | -     | -   | -     |

|                            |    |                                                                                                 |       |     |   |
|----------------------------|----|-------------------------------------------------------------------------------------------------|-------|-----|---|
| Core 1-Thr-                | 31 | Gal $\beta$ -3GalNAc $\alpha$ -O-Thr-NH-DA                                                      | -     | -   | - |
| SA1(2-3)-Core 1-Ser-       | 32 | NeuAc $\alpha$ -3Gal $\beta$ -3GalNAc $\alpha$ -O-Ser-NH-DA                                     | -     | -   | - |
| SA1(2-3)-Core 1-Thr-       | 33 | NeuAc $\alpha$ -3Gal $\beta$ -3GalNAc $\alpha$ -O-Thr-NH-DA                                     | 852   | -   | - |
| SA1(2-6)-Core 1-Ser-       | 34 | Gal $\beta$ -3GalNAc $\alpha$ -O-Ser-NH-DA<br> <br>NeuAc $\alpha$ -6                            | -     | -   | - |
| SA1(2-6)-Core 1-Thr-       | 35 | Gal $\beta$ -3GalNAc $\alpha$ -O-Thr-NH-DA<br> <br>NeuAc $\alpha$ -6                            | 224   | -   | - |
| SA2-Core 1-Ser-            | 36 | NeuAc $\alpha$ -3Gal $\beta$ -3GalNAc $\alpha$ -O-Ser-NH-DA<br> <br>NeuAc $\alpha$ -6           | 748   | -   | - |
| SA2-Core 1-Thr-            | 37 | NeuAc $\alpha$ -3Gal $\beta$ -3GalNAc $\alpha$ -O-Thr-NH-DA<br> <br>NeuAc $\alpha$ -6           | 436   | -   | - |
| Core 2-C3-N-               | 38 | Gal $\beta$ -3GalNAc $\alpha$ -O-C3-NH-DA<br> <br>GlcNAc $\beta$ -6                             | -     | -   | - |
| Core 2-Thr-                | 39 | Gal $\beta$ -3GalNAc $\alpha$ -O-Thr-NH-DA<br> <br>GlcNAc $\beta$ -6                            | 40    | -   | - |
| Core 3-Ser-                | 40 | GlcNAc $\beta$ -3GalNAc $\alpha$ -O-Ser-NH-DA                                                   | -     | -   | - |
| Core 3-Thr-                | 41 | GlcNAc $\beta$ -3GalNAc $\alpha$ -O-Thr-NH-DA                                                   | 1 450 | 549 | - |
| Gal-Core 3-Ser-            | 42 | Gal $\beta$ -4GlcNAc $\beta$ -3GalNAc $\alpha$ -O-Ser-NH-DA                                     | 40    | -   | - |
| Gal(3S)-Core 3-Ser-        | 43 | Gal (3S) $\beta$ -4GlcNAc $\beta$ -3GalNAc $\alpha$ -O-Ser-NH-DA                                | 151   | 16  | - |
| GalNAc-Gal(3S)-Core 3-Ser- | 44 | GalNAc $\beta$ -4Gal (3S) $\beta$ -4GlcNAc $\beta$ -3GalNAc $\alpha$ -O-Ser-NH-DA               | -     | -   | - |
| GSC 967-Ser-               | 45 | Gal $\beta$ -3GalNAc $\beta$ -4Gal (3S) $\beta$ -4GlcNAc $\beta$ -3GalNAc $\alpha$ -O-Ser-NH-DA | -     | -   | - |
| Core 4-C3-N-               | 46 | GlcNAc $\beta$ -3GalNAc $\alpha$ -O-C3-NH-DA<br> <br>GlcNAc $\beta$ -6                          | -     | -   | - |
| Core 4-Thr-                | 47 | GlcNAc $\beta$ -3GalNAc $\alpha$ -O-Thr-NH-DA<br> <br>GlcNAc $\beta$ -6                         | -     | -   | - |
| Man-PentaPep-              | 48 | YAT (Man) AV-NH-DA <sup>4</sup>                                                                 | -     | -   | - |
| Man-HexaPep-               | 49 | CYAT (Man) AV-NMe-DA <sup>4</sup>                                                               | 477   | -   | - |
| Man-UndecaPep-             | 50 | Sp-TriEG-SQSLEET (Man) ISPR-NH-DA <sup>3</sup>                                                  | -     | -   | - |



|                       |    |                                                                                                                                         |       |   |   |
|-----------------------|----|-----------------------------------------------------------------------------------------------------------------------------------------|-------|---|---|
| SB1a-                 | 71 | SU-3Gal $\beta$ -3GalNAc $\beta$ -4Gal $\beta$ -4Glc $\beta$ -Cer<br> <br>SU-3                                                          | -     | - | - |
| GalNAc-Ser-           | 72 | GalNAc $\alpha$ -Ser-DH                                                                                                                 | -     | - | - |
| GalNAc-Thr-           | 73 | GalNAc $\alpha$ -Thr-DH                                                                                                                 | -     | - | - |
| BSM-Di-A1-            | 74 | NeuGc $\alpha$ -6GalNAc-AO                                                                                                              | 633   | - | - |
| BSM-Di-A2-            | 75 | NeuAc $\alpha$ -6GalNAc-AO                                                                                                              | 3 112 | - | - |
| Gal $\beta$ -3GalNAc- | 76 | Gal $\beta$ -3GalNAc-AO                                                                                                                 | -     | - | - |
| Gal $\beta$ -6GalNAc- | 77 | Gal $\beta$ -6GalNAc-AO                                                                                                                 | -     | - | - |
| DST-                  | 78 | NeuAc $\alpha$ -3Gal $\beta$ -3GalNAc-AO<br> <br>NeuAc $\alpha$ -6                                                                      | 3 889 | - | - |
| Curd-13-              | 79 | Glc $\beta$ -3Glc $\beta$ -3Glc $\beta$ -3Glc $\beta$ -[3Glc $\beta$ -3Glc $\beta$ ] <sub>3</sub> -3Glc $\beta$ -3Glc $\beta$ -3Glc-AO* | -     | - | - |
| Cello-3-              | 80 | Glc $\beta$ -4Glc $\beta$ -4Glc-AO                                                                                                      | -     | - | - |
| GN2-                  | 81 | GlcNAc $\beta$ -4GlcNAc-AO                                                                                                              | -     | - | - |
| GN6-                  | 82 | GlcNAc $\beta$ -4GlcNAc $\beta$ -4GlcNAc $\beta$ -4GlcNAc $\beta$ -4GlcNAc $\beta$ -4GlcNAc-AO*                                         | -     | - | - |

<sup>1</sup>The oligosaccharide probes are all lipid-linked, neoglycolipids (NGLs) or glycosylceramides and are sorted by glycan backbone type referred to a position as in the binding charts in **Figure 4**.

<sup>2</sup>Abbreviations are as follows: DA, NGLs prepared using a new aldehyde-terminating lipid reagent to conjugate with amino-terminating glycans; NX, NH or NMe; C2, -CH<sub>2</sub>-CH<sub>2</sub>-; C3, -CH<sub>2</sub>-CH<sub>2</sub>-CH<sub>2</sub>-; C5, -CH<sub>2</sub>-CH<sub>2</sub>-CH<sub>2</sub>-CH<sub>2</sub>-CH<sub>2</sub>-; Gly, glycine; Ser, serine; Thr, threonine; Ph, phenyl; Gly, glycine. For the control probes: DH, NGLs prepared from reducing oligosaccharides by reductive amination with the amino lipid, 1,2-dihexadecyl-sn-glycero-3-phosphoethanolamine (DHPE)(Chai et al. 2003); AO, NGLs prepared from reducing oligosaccharides by oxime ligation with an aminooxy (AO) functionalized DHPE(Liu et al. 2007); Cer, natural glycolipids with various ceramide moieties.

<sup>3</sup>Means of fluorescence intensities of duplicate spots printed at the high level of probe arrayed (5fmol/spot); –, less than 1.

<sup>4</sup>O-mannosyl glycopeptide.

\*Asterisks indicate that major components are depicted.

## References

- Bartels MF, Winterhalter PR, Yu J, et al. 2016. Protein O-mannosylation in the murine brain: Occurrence of Mono-O-Mannosyl glycans and identification of new substrates. *PLoS One*. 11: e0166119.
- Chai W, Hounsel EF, Cashmore GC, Rosankiewicz JR, Feeney J, Lawson AM. 1992. Characterisation by mass spectrometry and <sup>1</sup>H-NMR of novel hexasaccharides among the acidic O-linked carbohydrate chains of bovine submaxillary mucin. *Eur J Biochem*. 207: 973–80.
- Chai W, Stoll MS, Galustian C, et al. 2003. Neoglycolipid technology: Deciphering information content of glycome. *Methods Enzymol*. 362: 160–195.
- Gao C, Liu Y, Zhang H, et al. 2014. Carbohydrate sequence of the prostate cancer-associated antigen F77 assigned by a mucin O-glycome designer array. *J Biol Chem*. 289: 16462–16477.
- Likhoshesterov L.M., Novikova O.S., Yamskov I.A. PVE. 2012. Synthesis of N-glycyl-beta-glycopyranosylamines, human milk fucooligosaccharide derivatives. *Russ Chem Bull*. 61: 1816–1817.
- Likhoshesterov LM, Novikova OS, Malysheva NN, et al. 2015. Synthesis of mono- and di- $\alpha$ -l-fucosylated 2-acetamido-2-deoxy-N-glycyl- $\beta$ -d-glucopyranosylamines modeling N-glycoprotein carbohydrate-peptide bond region based on 2-acetamido-N-(N-tert-butyloxycarbonylglycyl)-2-deoxy- $\beta$ -d-glucopyranosylamine. *Russ Chem Bull*. 64: 1445–1450.
- Likhoshesterov LM, Novikova OS, Sakharov AM, et al. 2016. Synthesis of N-aminoacyl- $\beta$ -glycopyranosylamines — derivatives of natural sialooligosaccharides. *Russ Chem Bull*. 65: 1617–1624.
- Liu Y, Feizi T, Campanero-Rhodes MA, et al. 2007. Neoglycolipid Probes Prepared via Oxime Ligation for Microarray Analysis of Oligosaccharide-Protein Interactions. *Chem Biol*. 14: 847–859.
- Liu Y, Childs RA, Palma AS, et al. 2012. Neoglycolipid-Based Oligosaccharide Microarray System: Preparation of NGLs and Their Noncovalent Immobilization on Nitrocellulose-Coated Glass Slides for Microarray Analyses BT - Carbohydrate Microarrays: Methods and Protocols. In: Chevlot Y (ed). Totowa, NJ: Humana Press, pp. 117–136.
- Nishimura S-I, Kuzuhara H, Takiguchi Y, et al. 1989. Peracetylated chitobiose: Preparation by specific degradations of chitin, and chemical manipulations. *Carbohydr Res*. 194: 223–231.
- Palma AS, Liu Y, Childs RA, et al. 2011. The human epithelial carcinoma antigen recognized by monoclonal antibody AE3 is expressed on a sulfoglycolipid in addition to neoplastic mucins. *Biochem Biophys Res Commun*. 408: 548–552.
- Palma AS, Liu Y, Zhang H, et al. 2015. Unravelling glucan recognition systems by glucome microarrays using the designer approach and mass spectrometry. *Mol Cell Proteomics*. 14: 974–988.
- Parkkinen J, Finne J. 1983. Isolation and structural characterization of five major sialyloligosaccharides and a sialylglycopeptide from normal human urine. *Eur J Biochem*. 136: 355–361.
- Piskarev VE, Shuster AM, Gabibov AG, et al. 1990. A novel preparative method for the isolation of avidin and riboflavin-binding glycoprotein from chicken egg-white by the use of high-performance liquid chromatography. *Biochem J*. 265: 301–304.
- Vendele I, Willment JA, Silva LM, et al. 2020. Mannan detecting C-type lectin receptor probes recognise immune epitopes with diverse chemical, spatial and phylogenetic heterogeneity in fungal cell walls. *PLoS Pathog*. 16: 1–29.
- Weishaupt MW, Matthies S, Seeberger PH. 2013. Automated solid-phase synthesis of a  $\beta$ -(1,3)-glucan dodecasaccharide. *Chem - A Eur J*. 19: 12497–12503.
- Weishaupt MW, Hahm HS, Geissner A, et al. 2017. Automated glycan assembly of branched  $\beta$ -(1,3)-glucans to identify antibody epitopes. *Chem Commun*. 53: 3591–3594.
